## Concurrent depletion of Vps37 proteins evokes ESCRT-I destabilization and profound cellular stress responses

Krzysztof Kolmus<sup>1</sup>, Purevsuren Erdenebat<sup>1†</sup>, Blair Stewig<sup>1†</sup>, Ewelina Szymańska<sup>1</sup>, Krzysztof Goryca<sup>2††</sup>, Edyta Derezińska-Wołek<sup>3,4</sup>, Anna Szumera-Ciećkiewicz<sup>3,4</sup>, Marta Brewińska-Olchowik<sup>5</sup>, Katarzyna Piwocka<sup>5</sup>, Monika Prochorec-Sobieszek<sup>3,4</sup>, Michał Mikula<sup>2</sup>, Marta Miaczyńska<sup>1\*</sup>

### Affiliations:

<sup>1</sup> Laboratory of Cell Biology, International Institute of Molecular and Cell Biology, 02-109, Warsaw, Poland

<sup>2</sup> Department of Genetics, Maria Skłodowska-Curie National Research Institute of Oncology, 02-781, Warsaw, Poland

<sup>3</sup> Department of Pathology and Laboratory Medicine, Maria Skłodowska-Curie National Research Institute of Oncology, 02-781, Warsaw, Poland

<sup>4</sup> Department of Diagnostic Hematology, Institute of Hematology and Transfusion Medicine, 02-776, Warsaw, Poland

<sup>5</sup> Laboratory of Cytometry, Nencki Institute of Experimental Biology, 02-093, Warsaw, Poland

\* Corresponding author: Tel: +48 22 597 07 25; Email: [miaczynska@iimcb.gov.pl](mailto:miaczynska@iimcb.gov.pl)

† These authors contributed equally.

†† Present address: Next-Generation Sequencing Core Facility, Centre of New Technologies UW, 02-097, Warsaw, Poland

**Running title:** Vps37 depletion induces cell stress.

**Key words:** ESCRT, Vps37, Tsg101, colorectal cancer, inflammation, cell growth

1 **SUMMARY STATEMENT**

2 Endosomal Sorting Complex Required for Transport (ESCRT)-I destabilization upon concurrent  
3 depletion of Vps37 proteins is linked to the activation of sterile inflammatory response and cell  
4 growth inhibition.

5

6 **ABSTRACT**

7 Molecular details of how endocytosis contributes to oncogenesis remain elusive. Our *in silico*  
8 analysis of colorectal cancer (CRC) patients revealed stage-dependent alterations in the  
9 expression of 113 endocytosis-related genes. Among them transcription of the Endosomal  
10 Sorting Complex Required for Transport (ESCRT)-I component *VPS37B* was decreased in the  
11 advanced stages of CRC. Expression of other ESCRT-I core subunits remained unchanged in the  
12 investigated dataset. We analyzed an independent cohort of CRC patients showing also reduced  
13 *VPS37A* mRNA and protein abundance. Transcriptomic profiling of CRC cells revealed non-  
14 redundant functions of Vps37 proteins. Knockdown of *VPS37A* and *VPS37B* triggered p21-  
15 mediated inhibition of cell proliferation and sterile inflammatory response driven by the Nuclear  
16 Factor (NF)- $\kappa$ B transcription factor and associated with mitogen-activated protein kinase  
17 signaling. Co-silencing of *VPS37C* further potentiated activation of these independently induced  
18 processes. The type and magnitude of transcriptional alterations correlated with the differential  
19 ESCRT-I stability upon individual and concurrent Vps37 depletion. Our study provides novel  
20 insights into cancer cell biology by describing cellular stress responses that are associated with  
21 ESCRT-I destabilization, which might occur in CRC patients.

## 22 INTRODUCTION

23 Genetic alterations induce the reprogramming of intracellular signaling, which is a driving force  
24 of tumorigenesis. The duration of signal transduction is dependent on endocytosis (Floyd and De  
25 Camilli, 1998; Mosesson et al., 2008; Schmid, 2017). Some mechanisms for tumor cell-specific  
26 changes in the activity of endocytic machinery components that affect intracellular signaling  
27 have been already identified (Barbieri et al., 2016; Di Fiore and von Zastrow, 2014; Mellman  
28 and Yarden, 2013). For instance, many tumors exhibit deregulated expression of the  
29 ubiquitination machinery and small GTPases that control the rate of receptor degradation and  
30 recycling, respectively (Porter and Barbieri, 2015). However, despite the abundance of publicly  
31 available data, such as those deposited in The Cancer Genome Atlas [TCGA] (Weinstein et al.,  
32 2013), little has been done to systematically analyze the expression of receptor trafficking  
33 regulators in tumors and across tumor stages. This knowledge could potentially facilitate  
34 patients' stratification for treatment with bioengineered macromolecules delivered through  
35 receptor-mediated endocytosis (Tashima, 2018).

36 An important group of trafficking regulators constitute four sequentially acting Endosomal  
37 Sorting Complexes Required for Transport (ESCRT-0, ESCRT-I, ESCRT-II, and ESCRT-III)  
38 and accessory proteins, among others Vps4A and Vps4B. The ESCRT machinery mediates  
39 receptor degradation not only by recognition and local clustering of ubiquitinated cargo on  
40 endosomes but also through membrane deformation and scission to form intraluminal vesicles  
41 (ILVs). Many rounds of ILV formation create multivesicular bodies that fuse with lysosomes  
42 leading to cargo degradation. In addition, ESCRTs contribute to cytokinesis, autophagy, virus  
43 budding, exovesicle release, and repair of plasma and intracellular membranes (Hurley, 2015;  
44 Olmos and Carlton, 2016; Szymanska et al., 2018; Vietri et al., 2020). Despite the well-  
45 established roles of ESCRT components in maintaining cell homeostasis, much less is known  
46 about their contribution to tumorigenesis (Alfred and Vaccari, 2016; Gingras et al., 2017;  
47 Matissek and Teis, 2014) and the underlying molecular mechanism has been clarified only in a  
48 couple of cases (Manteghi et al., 2016; Sadler et al., 2018). For instance, we demonstrated that  
49 the expression of *VPS4B*, encoding ESCRT-associated ATPase, is decreased in colorectal cancer  
50 (CRC) and *VPS4B*-deficient cells are critically dependent on the Vps4A protein. This synthetic  
51 lethality between *VPS4* paralogs triggers stress-associated sterile inflammatory response and

52 immunogenic cell death and thus may be used as a basis for personalized therapy (Szymanska et  
53 al., 2020).

54 ESCRT-I is a heterotetramer composed of three core components (Tsg101, Vps28 and one of  
55 four Vps37 family members) and a single auxiliary protein (UBAP-1, Mvb12A or Mvb12B)  
56 (Stefani et al., 2011; Wunderley et al., 2014). At least under some conditions two of its subunits  
57 (Tsg101 and Vps37A) have been identified as putative tumor suppressors (Li and Cohen, 1996;  
58 Moberg et al., 2005; Xu et al., 2003). In parallel, high-throughput screens for cancer  
59 vulnerability within the DepMap project (Behan et al., 2019) demonstrated that multiple cancer  
60 cell lines display a reduced fitness upon *TSG101* knockout, whilst the effect of perturbed  
61 expression of *VPS28*, *VPS37A*, *VPS37C* or *UBAPI* genes is cell type-dependent.

62 Tsg101 and Vps37A are not only regulators of vesicular trafficking but also other biological  
63 processes, such as transcription and autophagy (Bache et al., 2004; Bishop et al., 2002).  
64 Transcriptomic analysis of Tsg101-depleted cancer cells revealed increased expression of the  
65 prototypical Nuclear Factor- $\kappa$ B (NF- $\kappa$ B)-dependent genes without exogenous stimulation  
66 (Brankatschk et al., 2012). We dissected the molecular basis of this phenomenon showing that  
67 the absence of Tsg101 or Vps28 led to the accumulation of ligand-free cytokine receptors on  
68 endosomes because of disturbed sorting into ILVs and degradation of cargo. The proximity of  
69 accumulated receptors on endosomes evoked their oligomerization to trigger NF- $\kappa$ B signaling  
70 (Banach-Orlowska et al., 2018; Maminska et al., 2016). However, none of the Vps37 proteins  
71 incorporated into ESCRT-I was identified as a genuine regulator of the NF- $\kappa$ B pathway.

72 NF- $\kappa$ B is a family of ubiquitously expressed transcription factors, whose activation is a hallmark  
73 of inflammation often associated with cancer (Taniguchi and Karin, 2018). These transcription  
74 factors mediate also other biological processes, such as proliferation (Zhang et al., 2017). There  
75 are two interconnected NF- $\kappa$ B signaling cascades. The canonical NF- $\kappa$ B pathway culminates in  
76 the phosphorylation and degradation of the I $\kappa$ B $\alpha$  inhibitor, that allows an active p65-p50 NF- $\kappa$ B  
77 dimer to translocate into the nucleus. The non-canonical signaling cascade marks the p100 NF-  
78  $\kappa$ B precursor for proteasomal processing to p52 to form transcriptionally active complexes with  
79 RelB (Hayden and Ghosh, 2008). Although endocytic trafficking and NF- $\kappa$ B inflammatory  
80 signaling are important in carcinogenesis, the molecular links between them are poorly studied.



81 Here, we systematically analyzed the expression of endocytosis regulators across stages of CRC  
82 using publically available data and found decreased expression of *VPS37* paralogs. As no  
83 genome-wide expression studies have explored the cellular consequences of individual and  
84 concurrent depletion of *Vps37* family members, we investigated their roles focusing on the  
85 processes related to cell growth and inflammatory response. Our findings reveal the importance  
86 of *VPS37* paralogs in orchestrating cell homeostasis through maintaining the stability of ESCRT-  
87 I.

88

## 89 **RESULTS**

### 90 **Expression of *VPS37B* is decreased in advanced colorectal cancer**

91 CRC is a leading cause of cancer-associated deaths worldwide as it is often diagnosed in  
92 advanced stages when patients display clinical symptoms (Siegel et al., 2018). Aberrant  
93 endosomal trafficking in CRC has been linked to adverse phenotype and resistance to therapies  
94 (Gargalionis et al., 2015). In order to gain insight into transcriptional changes of genes involved  
95 in endosomal trafficking in CRC, we mined the TCGA data against a custom-made list (Table  
96 S1) of components whose biological function was related to endocytic transport. Matched  
97 normal and cancer transcriptomic samples of human CRC cohorts (colon adenocarcinoma  
98 [COAD] and rectal adenocarcinoma [READ]) with available clinicopathological information (31  
99 patients in total) were divided based on tumor staging to early (Stage I and II; 19 patients) or  
100 advanced (Stage III and IV; 12 patients) disease stage pools (Fig. 1A). Out of the 445 endocytic  
101 genes tested, 410 genes fulfilled normalization criteria of the present analysis (see Materials and  
102 Methods). We observed differential gene expression of 113 genes at different stages of CRC  
103 when compared to levels transcribed in matched healthy colon tissue (Fig. 1B). Differential  
104 expression of 20 genes was unique for the early stages (Table S2). 21 genes were differentially  
105 expressed in the advanced stages of tumorigenesis (Table S3). In addition to decreased mRNA  
106 abundance of *VPS4B*, which we studied before (Szymanska et al., 2020), we detected reduced  
107 expression of an ESCRT-I component – *VPS37B* – in the advanced stages of CRC (Fig. 1C).

108 Since we and others had demonstrated that two out of three core ESCRT-I components, namely  
109 Tsg101 and Vps28, restrict NF- $\kappa$ B-dependent transcription (Brankatschk et al., 2012; Maminska

110 et al., 2016), we analyzed expression of genes encoding the core ESCRT-I subunits in normal  
111 colorectal tissue samples from the TCGA datasets. Using the transcripts per million (TPM)  
112 metrics to normalize expression data with respect to gene length and sequencing depth, we  
113 observed that colorectal tissue and its cancer counterpart expressed high levels of *TSG101*,  
114 *VPS28*, *VPS37B*, followed by comparable levels of *VPS37A* and *VPS37C*, and negligible levels  
115 of *VPS37D*. Differential expression analysis of CRC samples compared against matching healthy  
116 tissue controls revealed that transcription of *VPS37B* tended to be decreased in the early stages of  
117 CRC, and was reduced 1.61-fold in the advanced stages (Table S4). Expression of *VPS28* was  
118 slightly decreased in the early stages of tumorigenesis (Table S4). On the other hand, levels of  
119 *TSG101*, *VPS37A* and *VPS37C* were stably expressed across tumor stages (Fig. 1D, Table S4).

120 In summary, expression of *VPS37B* is decreased during progression from early to advanced  
121 stages of CRC, whilst transcription of the remaining ESCRT-I components is unchanged.

122

### 123 **mRNA and protein abundance of *VPS37A* and *VPS37B* paralogs is decreased in CRC** 124 **patient cohorts**

125 Since the expression of *VPS37B* was decreased in samples deposited in the TCGA database and  
126 *VPS37A* mRNA and protein abundance was previously shown to be reduced in CRC patients  
127 (Chen et al., 2018; Miller et al., 2018; Vasaikar et al., 2019), we performed qRT-PCR analysis of  
128 *VPS37* mRNA levels using an independent set of CRC samples from our previous study (Mikula  
129 et al., 2011; Skrzypczak et al., 2010). We observed a significant decrease in *VPS37B* and  
130 *VPS37A* mRNA abundance in adenocarcinoma (Fig. 2A).

131 To assess whether transcriptional alterations at mRNA level correlate with the diminished  
132 abundance of Vps37 proteins in CRC, we performed immunohistochemistry (IHC) staining of  
133 Vps37A and Vps37B in an array setup consisting of 100 pairs of treatment-naïve primary CRC  
134 samples and non-cancerous colon tissue using specific antibodies (Fig. S1A-E). We evaluated  
135 the tissue arrays using a semi-quantitative scoring method based on staining intensity.

136 Both Vps37A and Vps37B displayed strong cytoplasmic staining in normal colon tissue (Fig.  
137 2B). Out of the 100 investigated patient samples, protein staining of Vps37A was decreased to  
138 the medium intensity level (3+ → 2+) in cancerous tissue of all examined patients. Vps37B

139 protein staining was decreased to the medium intensity level (3+ → 2+) in 70% of patients and to  
140 weak intensity levels (3+ → 1+) in 30% of patients (Fig. 2C). Since the analyzed group of  
141 treatment-naïve CRC patients was very homogenous with respect to pathological tumor (pT)  
142 status, pathological nodes (pN) and disease grade (Table S5), we could not correlate Vps37  
143 staining intensity with clinical disease staging.

144 Overall, these results corroborated the finding of our bioinformatics analysis that the abundance  
145 of *VPS37B* is decreased at transcriptional and protein levels in CRC. They further mounted  
146 evidence for reduced mRNA and protein levels of *VPS37A* in CRC.

147

#### 148 **Concurrent depletion of Vps37 proteins induces multifaceted transcriptional responses in** 149 **CRC cells**

150 Humans have four *VPS37* genes whose protein products display distinct domain architecture  
151 suggesting partly different functions in the cells. They all possess the Mod(r) domain mediating  
152 interaction with the remaining core ESCRT-I subunits. Whereas only Vps37A has the ubiquitin-  
153 binding UEV domain, the other members contain the proline-rich region (PRR) essential for  
154 protein-protein interactions (Fig. 3A). To study the cellular functions of Vps37 paralogs, we used  
155 an *in vitro* model of human colon cancer DLD1 cell line. The expression levels of *VPS37*  
156 paralogs in the DLD1 cell line reflect those observed in samples of CRC patients deposited in  
157 TCGA (Dou et al., 2016), as well in our data (GSE152195).

158 To gain insights into the molecular consequences of individual and concurrent depletion of  
159 Vps37 proteins on cellular homeostasis, we performed RNA-Seq in DLD1 cells. We first  
160 verified high knockdown efficiency and selectivity of siRNA (two independent sequences per  
161 target) by measuring the protein abundance of the three paralogs in DLD1 cells (Fig. S2A-C).  
162 Despite the sequence similarity between *VPS37A*, *VPS37B* and *VPS37C* (Fig. 3A), we could  
163 selectively silence the expression of each individual paralog or their combinations. As we  
164 observed certain differences in the silencing efficiency, we used single strongly acting siRNAs  
165 for RNA-Seq to knockdown *VPS37* paralogs individually or in double and triple combinations (7  
166 conditions), compared to non-transfected cells (NT) and cells transfected with a combination of  
167 non-targeting siRNA (siCTRL#1). Nevertheless, all subsequent experiments were performed

168 with two independent siRNA sequences per target. We considered genes to be differentially  
169 expressed when their expression was either below 0.667-fold or above 1.5-fold, and adjusted  
170  $P < 0.05$  when normalizing against the two control conditions – siCTRL#1 and non-transfected  
171 cell (NT) (Fig. S2D).

172 We observed that co-silencing of *VPS37A*, *VPS37B* and *VPS37C* (abbreviated as *VPS37ABC*)  
173 elicited the greatest transcriptional changes (1277 genes). Pronounced changes (781 genes) were  
174 also detected after concurrent silencing of *VPS37AB* indicating the importance of these two  
175 subunits in maintaining homeostasis of DLD1 cells. Conversely, a limited number of genes  
176 underwent transcriptional changes upon other silencing combinations of *VPS37* family members  
177 (Fig. S2D). Hierarchical clustering of all investigated conditions on a set of differentially  
178 expressed genes after individual, double and triple silencing demonstrated that the branch  
179 containing siVPS37ABC#1 and siVPS37AB#1 was clearly distinct from the remaining  
180 conditions (Fig. S2E). We further observed that the pools of genes induced upon single depletion  
181 of *Vps37A*, *Vps37B* and *Vps37C* were largely non-overlapping (Fig. S2F), indicating that  
182 multifaceted transcriptional responses induced upon co-depletion of *Vps37* proteins stem from  
183 the accumulation of paralog-specific defects in the cells.

184 Differentially expressed genes under each silencing conditions were subjected to the Gene  
185 Ontology (GO) analysis of biological processes. We identified biological processes only in  
186 transfection conditions with knockdown of the *VPS37A* paralog: siVPS37A#1, siVPS37AB#1,  
187 *VPS37AC*#1 and *VPS37ABC*#1. Among the top 15 gene signatures (whose order was  
188 determined based on a number of genes in the cluster upon *VPS37ABC* silencing) were processes  
189 related to cell migration, cellular signaling, inflammatory response, cell growth, and adhesion  
190 (Fig. 3B). We further focused on the “inflammatory response” (GO:0006954) and “regulation of  
191 growth” (GO:0040008) gene clusters. The inflammatory response heatmap contained genes  
192 encoding cytokines (*CXCL8*), adhesion molecules (*ICAM1*), and negative regulators of NF- $\kappa$ B  
193 signaling (*TNFAIP3*). In-depth interrogation of genes linked to the “regulation of growth”  
194 showed the presence of cyclin-dependent kinase inhibitors (*CDKN1A*, *CDKN2D*) and regulators  
195 of cell growth (*HMGA2*, *SFN*) (Fig. 3C,D). To determine the signaling pathways associated with  
196 inflammatory response and regulation of cell growth, we conducted a pathway network analysis  
197 using the Reactome Database. Our analysis of differentially expressed genes yielded enrichment

198 of annotations related to signaling initiated by cytokines, receptor tyrosine kinases, and G-protein  
199 coupled response and involving mitogen-activated protein kinases (MAPK) and PI3K/Akt (Fig.  
200 3E).

201 Collectively, these data point to largely non-redundant cellular functions of *VPS37* paralogs. The  
202 type and magnitude of transcriptional responses after their co-silencing are the cumulative  
203 response to perturbations of individual functions executed by Vps37 proteins. Concurrent  
204 knockdown of *VPS37AB* profoundly affects gene expression patterns linked to “inflammatory  
205 response” and “regulation of cell growth” and additional silencing of *VPS37C* paralog on top of  
206 *VPS37AB* knockdown further potentiates perturbations in gene transcription. These data  
207 suggested that Vps37 depletion activates multifaceted stress responses in the cells.

208

### 209 **Inflammatory gene expression is induced upon concurrent depletion of Vps37 proteins**

210 To validate our RNA-Seq analysis, we selected the most pronouncedly induced genes (based on  
211 the fold change values) from the inflammatory response cluster that represented different  
212 classes of molecules (cyto-/chemokine, adhesion molecule, classical and non-classical regulators  
213 of NF- $\kappa$ B signaling; Fig. 3C, GSE152195), and performed a qRT-PCR analysis of DLD1 cells  
214 subjected to individual or concurrent silencing of *VPS37* paralogs. We found that knockdown of  
215 *VPS37A* induced transcription of *TNFAIP3* (encoding A20) as well as *ICAMI* and had modest,  
216 yet insignificant, the effect on the expression of *CXCL8* (encoding IL-8) and *NFKBIA* (encoding  
217 I $\kappa$ B $\alpha$ ) (Fig. S3A-D). Silencing of either *VPS37B* or *VPS37C* did not affect any of the  
218 investigated genes. Concurrent Vps37AB depletion significantly promoted *CXCL8*, *NFKBIA* and  
219 *TNFAIP3* transcription and modestly affected *ICAMI* transcription. Expression of the *TNFAIP3*  
220 gene was also induced by concurrent *VPS37AC* silencing. Finally, we observed that concurrent  
221 knockdown of *VPS37ABC* increased the expression of *CXCL8*, *ICAMI*, *NFKBIA*, and *TNFAIP3*  
222 comparable to concurrent Vps37AB depletion (Fig. S3A-D).

223 Since the magnitude of transcriptional changes in DLD1 cells was modest, we tested the  
224 expression of the same genes in a poorly differentiated RKO carcinoma cell line. We found that  
225 knockdown of *VPS37A* had a modest, yet insignificant, effect on the expression of *CXCL8* and  
226 *ICAMI*, whereas it did not affect *TNFAIP3* or *NFKBIA* transcription (Fig. 4A-D). Silencing of

227 either *VPS37B* or *VPS37C* did not affect the expression of any of the investigated genes.  
228 Concurrent *VPS37AB* silencing induced an increase of *CXCL8*, *ICAM1*, *TNFAIP3*, and *NFKBIA*  
229 expression. Neither knockdown of *VPS37AC* nor *VPS37BC* substantially affected the  
230 transcription of the investigated targets (Fig. 4A-D). We observed that concurrent depletion of  
231 Vps37ABC had further positive effects on the magnitude of *CXCL8*, *ICAM1*, *NFKBIA* and  
232 *TNFAIP3* transcription compared to the Vps37AB-depleted cells (Figs 4A-D, S3E-G). Since the  
233 effects of individual and concurrent depletion of Vps37 proteins on gene expression were more  
234 pronounced in RKO cells, we decided to use it as the main model system in the subsequent  
235 experiments.

236 In summary, we found that concurrent depletion of Vps37 proteins, in particular Vps37AB and  
237 Vps37ABC, activates transcription of multiple classes of inflammatory genes, while knockdown  
238 of individual *VPS37* paralogs induces only minor changes in their expression. We also noted that  
239 the rate of gene transcription is cell- type dependent.

240

#### 241 **Concurrent knockdown of *VPS37* paralogs induces NF- $\kappa$ B signaling and MAPK cascade**

242 We and others previously revealed that depletion of the core ESCRT-I subunits – Tsg101 and  
243 Vps28 – induced NF- $\kappa$ B-driven inflammatory response (Brankatschk et al., 2012; Maminska et  
244 al., 2016). As our RNA-Seq analysis yielded the “inflammatory response” gene cluster upon  
245 siVPS37AB#1 and siVPS37ABC#1 (Fig. 3C), we combined genes from each cluster into a  
246 single list and subjected them for transcriptional motif-enrichment analysis using RcisTarget  
247 (Aibar et al., 2017). For each gene, the promoter region of 500 bp upstream and 100 bp  
248 downstream to the transcription starting site was investigated with the transcription factor  
249 binding sites (TFBS) matrices available in the JASPAR database. Our *in silico* analysis revealed  
250 enrichment of TFBS for the members of NF- $\kappa$ B, FOS, and AP1 transcription factors. The  
251 consensus sequence for RELA/p65 with the highest normalized enrichment score was the top  
252 annotated TFBS (Table 2).

253 Because concurrent silencing of *VPS37* paralogs enhanced the expression of NF- $\kappa$ B target genes  
254 (Figs 4A-D, S3A-D, Table 2), we explored the molecular basis of these effects. To this end we  
255 measured p65 phosphorylation and p100 to p52 processing as hallmarks of canonical and non-



256 canonical NF- $\kappa$ B signaling, respectively. Our Western blot analysis of lysates from RKO cells  
257 with silencing of individual *VPS37* paralogs as well as *VPS37AC* and *VPS37BC* showed no  
258 significant induction of any branch of the NF- $\kappa$ B pathway (Fig. 4E-G). *VPS37AB* knockdown  
259 induced p65 phosphorylation and cleavage of p100 to p52. Co-silencing of *VPS37ABC* induced  
260 p65 phosphorylation, cleavage of p100 to p52 (Fig. 4E, G), and compared to *Vps37AB* depletion  
261 also increased p100 levels (Fig. 4F).

262 MAPKs cooperate with NF- $\kappa$ B in driving inflammation (Hoesel and Schmid, 2013). Since  
263 signaling enrichment analysis of our transcriptomics data pointed to increased expression of  
264 genes whose products regulate the MAPK cascade, we tested phosphorylation of JNK, p38 and  
265 ERK as hallmarks of MAPK activation. Using Western blotting, we found that silencing of  
266 individual *VPS37* paralogs did not affect JNK, p38, and ERK phosphorylation (Fig. 4H-J).  
267 Knockdown of *VPS37AB* in RKO cells had minor positive, yet insignificant, effect on  
268 phosphorylation of JNK and p38 MAPK but did not activate ERK. Neither *VPS37AC* nor  
269 *VPS37BC* silencing activated JNK, p38 and ERK (Fig. 4H-J). Concurrent *Vps37ABC* depletion  
270 induced JNK and p38 phosphorylation but again it did not activate ERK (Fig. 4H-J).

271 Overall, we concluded that depletion of *Vps37ABC* is associated with the activation of canonical  
272 and non-canonical NF- $\kappa$ B signaling as well as JNK and p38 MAPK.

273

### 274 **Cell proliferation and colony forming ability of CRC cells are inhibited after concurrent** 275 **knockdown of *VPS37* paralogs**

276 As GO analysis of biological processes revealed the regulation of growth gene cluster (Fig. 3D,  
277 GSE152195), we examined the effect of differential depletion of *Vps37* proteins on cell growth  
278 using a short-term BrdU proliferation assay and a long-term colony formation assay in DLD1  
279 and RKO cells.

280 Using the proliferation assay, we observed that single silencing of *VPS37A* modestly decreased  
281 the proliferation rate, which was statistically significant only in RKO cells (Fig. 5A,B).  
282 Knockdown of neither *VPS37B* nor *VPS37C* altered growth of DLD1 and RKO cells. Silencing  
283 of *VPS37AB* significantly inhibited DLD1 and RKO cell proliferation, whilst knockdown of  
284 *VPS37AC* and *VPS37BC* had no impact. The strongest inhibition of cell proliferation was seen

285 upon *VPS37ABC* knockdown (Fig. 5A,B). In line with the results of proliferation assay,  
286 depletion of Vps37A alone or co-silencing of *VPS37AB*, *VPS37AC* and *VPS37ABC* inhibited  
287 ability of DLD1 and RKO cells to form colonies in the clonogenic assay performed 14 days after  
288 siRNA transfection (Figs 5C-D, S4A-B). In parallel, we checked the impact of *TSG101* silencing  
289 on cell proliferation and colony formation. Its knockdown in RKO cells inhibited both processes,  
290 comparably to concurrent silencing of *VPS37* paralogs (Fig. S4C-E).

291 In conclusion, we found that concurrent depletion of Vps37 proteins has detrimental effects on  
292 cancer cell growth *in vitro* and the phenotype of Tsg101-depleted cells closely resembles the one  
293 observed in *VPS37ABC* knockdown cells. Our results also indicate that growth rate is primarily  
294 dependent on the expression of both *VPS37A* and *VPS37B*. Additional co-silencing of *VPS37C*  
295 potentiated proliferation and colony-forming defects of *VPS37AB* knockdown. In contrast, long-  
296 term growth rate appears to be largely dependent on Vps37A.

297

### 298 **Concurrent depletion of Vps37 proteins induces p21-mediated cell cycle arrest**

299 Accelerated division of tumor cells is among others a result of abnormal activity of cyclins and  
300 cyclin-dependent kinase inhibitors (CDKNs) (Bonelli et al., 2014). As our RNA-Seq data  
301 revealed increased expression of three genes encoding *CDKNs* (*CDKN1A*, *CDKN2B*, and  
302 *CDKN2D*, GSE152195, Fig. 3D), we used qRT-PCR to corroborate their changed transcription  
303 in RKO and DLD1 cells subjected to individual and concurrent silencing of *VPS37* paralogs. In  
304 RKO cells, knockdown of *VPS37A* did not affect *CDKN1A* or *CDKN2B* transcription (Fig. 5E-F)  
305 but modestly induced the expression of *CDKN2D* (Fig. 5G). Silencing of either *VPS37B* or  
306 *VPS37C* did not change transcription of any of the analyzed genes. We found that *VPS37AB*  
307 silencing increased *CDKN1A*, *CDKN2B*, and *CDKN2D* transcription; yet in the case of  
308 *CDKN2B*, the increase was observed for only one pair of siRNA and did not reach statistical  
309 significance. Knockdown of neither *VPS37AC* nor *VPS37BC* paralogs had an impact on the  
310 investigated target genes (Fig. 5E-G). Instead, concurrent depletion of Vps37ABC further  
311 increased transcription of all investigated *CDKNs* compared to concurrent depletion of Vps37AB  
312 (Fig. 5E). In line, we found a similar pattern of *CDKN* expression in differentially transfected  
313 DLD1 cells; however, we could not corroborate enhanced *CDKN2D* transcription upon co-



314 depletion of Vps37 proteins that we initially identified in our RNA-Seq analysis (Fig. S4F-H).  
315 Finally, we observed that the transcription pattern of *CDKNs* after depletion of Tsg101 in RKO  
316 cells paralleled those observed for *CDKN1A* and *CDKN2B* expression after concurrent  
317 *VPS37ABC* silencing. In this case, silencing of *TSG101* did not induce *CDKN2D* expression  
318 (Fig. S4I).

319 Increased expression of *CDKNs* after concurrent Vps37ABC depletion suggests an impact on the  
320 proliferation rate and cell cycle progression. *CDKN1A* encodes p21, which inhibits cell cycle  
321 progression in the G1, S and G2 phases, whilst *CDKN2B* and *CDKN2D* encode p15<sup>INK4B</sup> and  
322 p19<sup>INK4D</sup>, respectively, which inhibit complexes formed by cyclin D and halt cell cycle in the G1  
323 phase (Bonelli et al., 2014). Thus, we evaluated the proliferation of Vps37ABC-depleted RKO  
324 cells upon co-silencing of the *CDKN1A* gene, which was the most pronouncedly induced in our  
325 qRT-PCR analysis. We observed that concurrent knockdown of *VPS37ABC* and *CDKN1A* partly  
326 rescued cell proliferation, corroborating the inhibitory impact of p15<sup>INK4B</sup> and p19<sup>INK4D</sup> on cell  
327 division (Fig. 5H). In line, p21 depletion in cells transfected with siRNA against *TSG101*  
328 improved RKO cell proliferation (Fig. S4J).

329 To gain further insights into the inhibition of cell growth after differential silencing of *VPS37*  
330 paralogs, siRNA-transfected RKO cells were stained with propidium iodide and cell cycle was  
331 analyzed by flow cytometry. We observed that knockdown of either *VPS37B* or *VPS37C* did not  
332 change cell cycle progression as indicated by the unaltered percentage of cells in the G0/G1 and  
333 S phases (Fig. 5I). Knockdown of *VPS37A* increased the percentage of cells in the G0/G1 phase  
334 and decreased the number of cells in the S phase (Fig. 5I). The impact of Vps37AC-depletion  
335 closely paralleled that observed after *VPS37A* silencing. In contrast to Vps37BC-depleted cells,  
336 whose cell cycle progression was not affected, concurrent knockdown of *VPS37AB* resulted in  
337 the increased number of cells in the G0/G1 phase and a drop in the S phase (Fig. 5I). The  
338 proportion of cells in the G0/G1 phase after combined silencing of *VPS37ABC* was comparable  
339 to that observed in Vps37AB-depleted cells (Fig. 5I). Finally, silencing of *TSG101* closely  
340 paralleled the effects observed after *VPS37ABC* knockdown (Fig. S4K). None of the analyzed  
341 silencing conditions (involving *VPS37* paralogs and *TSG101*) altered the percentage of cells in  
342 the G2/M phase (Figs 5I, S4K).

343 In summary, our data uncovered that concurrent depletion of Vps37 proteins induces the  
344 expression of three *CDKNs*, which cooperatively halt cell cycle in the G1 phase. Moreover, the  
345 phenotype of Tsg101-depleted cells closely resembles the one observed in *VPS37ABC*  
346 knockdown cells. We further demonstrated that *CDKN* expression and cell cycle progression are  
347 primarily dependent on Vps37A and modulated by the presence of other family members.

348

### 349 **NF- $\kappa$ B response and p21-mediated growth arrest are induced independently after depletion** 350 **of *VPS37* paralogs**

351 We next investigated the molecular basis for the induction of NF- $\kappa$ B response and p21-mediated  
352 growth arrest after depletion of all three Vps37 proteins in RKO cells. Since *CDKN1A* encoding  
353 p21 was the most potently affected gene in our qRT-PCR analysis (Fig. 5E) and its knockdown  
354 in Vps37ABC-depleted RKO cells partly rescued their proliferation (Fig. 5H), we used it as  
355 readout to assess the relationship between inflammatory response and cell growth arrest in  
356 Vps37ABC-depleted cells.

357 We first investigated the time course of changes in p21 levels and activation of the NF- $\kappa$ B  
358 pathway components after concurrent *VPS37ABC* silencing in RKO cells. We observed that  
359 depletion of Vps37ABC increased p21 abundance after 24 h and 72 h post-transfection (Fig. 6A).  
360 We found rapid phosphorylation of p65 in Vps37ABC-depleted cells, 24 h and 72 h post-  
361 transfection; however, after 24 h p65 phosphorylation did not reach statistical significance (Fig.  
362 6B). The abundance of p100/p52 increased from 24 h to 72 h post-transfection in cells with  
363 *VPS37ABC* knockdown (Fig. 6C,D). Throughout 24-72 h post-transfection, abundance of  
364 Vps37A, Vps37B and Vps37C gradually decreased after 24 h and remained undetectable after 72  
365 h post-transfection (Fig. S5A-C). These data showed that the activation of NF- $\kappa$ B signaling and  
366 production of p21 occurred within the similar timeframe after Vps37ABC depletion, thus none of  
367 these processes preceded each other.

368 In certain cell types, the canonical NF- $\kappa$ B pathway is crucial for *CDKN1A* transcription (Ledoux  
369 and Perkins, 2014) and we verified whether increased *CDKN1A* expression after co-depletion of  
370 Vps37 proteins required the canonical NF- $\kappa$ B subunit p65 (encoded by *RELA*). Knockdown of  
371 *RELA* in Vps37ABC-depleted cells did not affect *CDKN1A* expression (Fig. 6E), although it

372 almost completely blunted transcription of *CXCL8* (Fig. S5D) and substantially reduced  
373 expression of *ICAMI*, two prototypical NF- $\kappa$ B target genes (Figs S5E, S5F-I). These results  
374 suggest that negative effects on cell growth stemming from co-silencing of *VPS37* paralogs are  
375 not consequences of induction of canonical NF- $\kappa$ B signaling.

376 p21 modules NF- $\kappa$ B signaling in immune cells (Rackov et al., 2016; Trakala et al., 2009) but  
377 whether similar mechanisms occur in CRC cells has not been assessed. Thus, we explored  
378 whether silencing of *CDKN1A* affected phosphorylation of p65 and processing of p100 to p52  
379 upon Vps37ABC depletion. As assessed by Western blot, co-silencing of *VPS37* paralogs and  
380 *CDKN1A* did not affect the levels of p65 phosphorylation and p100 to p52 processing compared  
381 to co-silencing of *VPS37* paralogs alone (Figs 6F-H, S5J-M). We also checked whether p21  
382 depletion modulated the rate of inflammatory gene expression in Vps37ABC-depleted cells. Co-  
383 silencing of *CDKN1A* inhibited transcription of only *CXCL8* but not *ICAMI*, *TNFAIP3* and  
384 *NFKB1A* (Fig. 6I-L). These results showed no modulatory impact of p21 on NF- $\kappa$ B signaling and  
385 three out of four investigated target genes.

386 Overall, we concluded that in CRC cells with co-depletion of Vps37 proteins the induction of  
387 NF- $\kappa$ B inflammatory response and p21-mediated cell growth inhibition are two independent  
388 processes. These data point out that cell growth arrest is not caused by activation of  
389 inflammatory response.

390

### 391 **ESCRT-I is destabilized after either concurrent depletion of Vps37 proteins or *TSG101*** 392 **silencing**

393 We speculated that the type and magnitude of transcriptional responses after individual and  
394 concurrent silencing of *VPS37* paralogs might be attributed to distinct ESCRT-I stability. It was  
395 previously shown that knockdown of some ESCRT-I core components induced partial or  
396 complete degradation of other complex subunits (Stefani et al., 2011; Wunderley et al., 2014);  
397 yet, a detailed characterization of all ESCRT-I subunits after individual and concurrent Vps37  
398 proteins depletion has not been performed so far.

399 First, we checked whether knockdown of individual ESCRT-I components affected the stability  
400 of its remaining subunits expressed in CRC cells. Western blot analysis of lysates from RKO

401 cells revealed that depletion of either Tsg101 or Vps28 destabilized each other (Fig. S6A,B) as  
402 well as Vps37A, Vps37B, Vps37C, Mvb12A, Mvb12B, and lowered UBAP-1 protein abundance  
403 (Fig. S6C-H). We observed that silencing of *VPS37A* diminished UBAP-1 protein abundance  
404 indicating that ESCRT-I complexes containing Vps37A preferentially incorporate UBAP-1 (Fig.  
405 S6F). Depletion of Vps37B reduced the abundance of Tsg101 protein (Fig. S6A) and partially  
406 Mvb12A (Fig. S6G). Conversely, silencing of *MVB12A* decreased Vps37B (Fig. S6D),  
407 indicating partnering preference between these subunits. We did not observe any relationship  
408 between the stability of Vps37C and Mvb12 proteins (Figs S6E, S6G-H).

409 We next analyzed the stability of ESCRT-I core and auxiliary subunits upon concurrent silencing  
410 of two or three *VPS37* paralogs. Co-depletion of Vps37AB or Vps37BC proteins decreased  
411 Tsg101 and Vps28 abundance, whilst the effects of *VPS37AC* knockdown were less potent (Fig.  
412 7D,E). Knockdown of all three *VPS37* genes led to the complete destabilization of Tsg101 and  
413 Vps28 proteins (Fig. 7D-E). Protein abundance of UBAP-1 was decreased in all silencing  
414 combinations involving *VPS37A* (Fig. 7F) corroborating the results of individual *VPS37A*  
415 knockdown (Fig. S6F). Similarly, Mvb12A abundance was reduced whenever cells were  
416 depleted of Vps37B (Fig. 7G), whilst such effect was less pronounced for Mvb12B (Fig. 7H).  
417 Silencing of all *VPS37* genes depleted both Mvb12 proteins (Fig. 7G,H). Notably, the stability of  
418 the core and auxiliary ESCRT-I subunits after concurrent *VPS37ABC* knockdown closely  
419 resembled the effects of *TSG101* silencing (Fig. S6A).

420 In summary, these data show an inter-dependability of ESCRT-I subunits for maintaining the  
421 complex stability. They indicate that the incorporation of auxiliary subunits is selective with  
422 respect to their Vps37 partners (Vps37A with UBAP-1 and Vps37B with Mvb12A). We also  
423 found that simultaneous interference with *VPS37A* and *VPS37B* expression induces pronounced  
424 decrease in ESCRT-I stability and Vps37C depletion only slightly magnifies this effect. Our  
425 results further argue that the type and magnitude of transcriptional responses after differential  
426 depletion of Vps37 proteins correlate with the abundance of core and accessory ESCRT-I  
427 components.

428

## 429 **DISCUSSION**

430 Tumors develop various mechanisms to prolong exposure of plasma membrane receptors to  
431 ensure constitutive signaling that is beneficial for their growth. One of such mechanisms relies  
432 on altered expression of endocytic transport regulators (Barbieri et al., 2016; Floyd and De  
433 Camilli, 1998; Mellman and Yarden, 2013; Mosesson et al., 2008; Schmid, 2017). The advent of  
434 next-generation sequencing technologies has permitted unbiased screening of components  
435 orchestrating receptor transport and endo-lysosomal degradation in distinct pathological settings  
436 (Buser et al., 2019; Yoshida et al., 2010). Here, by mining TCGA data we revealed differential  
437 expression of 113 endocytic machinery components across stages of CRC, several of which were  
438 previously shown to be reduced in adenocarcinoma (Kwong et al., 2005; Szymanska et al., 2020;  
439 Tanigawa et al., 2019). In-depth validation of our *in silico* screen uncovered reduced mRNA and  
440 protein abundance of *VPS37A* and *VPS37B* paralogs in CRC patients. Our *in vitro* data further  
441 allowed us to propose that Vps37 proteins have partly non-overlapping functions in the cell. We  
442 also showed that co-depletion of Vps37 proteins evokes stress responses manifested among  
443 others by activation of the NF- $\kappa$ B inflammatory response and p21-mediated impairment of cell  
444 growth. We finally correlated the magnitude of stress responses with the degree of ESCRT-I  
445 subunit destabilization after (co-)depletion of Vps37 proteins. While decreased abundance of  
446 *VPS37A* and/or *VPS37B* mRNA and proteins appears not to be an oncogenic driver per se, these  
447 passenger alterations might represent potential vulnerabilities of cancer cells to therapeutic  
448 treatment.

449 In humans, there are four *VPS37* paralogs with distinct chromosomal localization, number of  
450 splicing isoforms, and protein sequence identity. *VPS37A*, *VPS37B*, *VPS37C* and *VPS37D* are  
451 localized on chromosome 8p, 12q, 11q, and 7q, respectively. This different chromosomal  
452 localization of *VPS37* genes could favor independent regulatory mechanisms of expression in  
453 patho-physiological circumstances. Another layer of complexity is added by the incorporation of  
454 Vps37 proteins into ESCRT-I to form functionally distinct complexes in the cell (Stefani et al.,  
455 2011; Wunderley et al., 2014). Changes in mRNA and protein levels of *VPS37A* were previously  
456 documented in various cancer types, including liver, prostate, breast, ovarian, renal, lung,  
457 glioma, gastric, oral and oropharyngeal squamous cell carcinoma and colon cancer (Chen et al.,  
458 2015; Chen et al., 2020; Chen et al., 2018; Du et al., 2016; Fu et al., 2018; Lai et al., 2009;  
459 Perisanidis et al., 2013; Sun et al., 2017; Vasaikar et al., 2019; Wittinger et al., 2011; Wu et al.,

2019; Xu et al., 2017a; Xu et al., 2017b; Xu et al., 2014; Xu et al., 2017c; Xu et al., 2003; Yang et al., 2016; Yang et al., 2017; Zhu et al., 2015). Several of these studies suggested that *VPS37A* acts as a tumor suppressor and its loss can serve as an adverse prognostic factor. However, the abundance of the remaining *VPS37* paralogs at mRNA and protein levels as well as their contribution to oncogenesis have not been investigated across cancer types and disease stages.

By mining the TCGA expression data, we revealed decreased expression of *VPS37B* during the transition from early to advanced stages of colorectal adenocarcinoma. Analysis of an independent cohort of patients corroborated results of our *in silico* prediction that *VPS37B* expression is indeed reduced in adenocarcinoma patients. Additionally, we found decreased expression of *VPS37A* in the analyzed group of patients. We further confirmed the lower abundance of both proteins in treatment-naïve primary CRC samples belonging largely to the locally advanced disease. The observations we made on *VPS37* paralog expression extend previous bioinformatics analysis of COAD and READ cohorts performed without grouping these patients based on disease stages (Miller et al., 2018) and a proteogenomic study of a homogenous cohort of treatment-naïve patients undergoing primary surgery for colon adenocarcinoma (Vasaikar et al., 2019). The *VPS37A* gene undergoes frequent deletion as a part of 8p during progression from adenoma to adenocarcinoma, which would explain its decreased abundance at mRNA and protein levels (Meijer et al., 1998). On the other hand, further studies will need to clarify the molecular origin of diminished *VPS37B* expression in CRC as chromosome 12q, where it is located, undergoes frequent amplifications, suggesting an existence of a (post-)transcriptional mechanism (Wood et al., 2007).

The present study provided comprehensive understanding of the consequences of Vps37 protein depletion in CRC cells in all possible combinations of paralogs expressed at high levels in these cells, namely *VPS37A*, *VPS37B* and *VPS37C*. Analysis of the transcriptome of CRC cells revealed that Vps37 proteins have partly non-overlapping function as deduced from distinct sets of genes induced upon their individual depletion. It also suggests that the type and magnitude of transcriptional responses upon concurrent *VPS37* paralog silencing stem from the cumulative inhibition of cellular processes executed by their protein products. Among genes induced upon either *VPS37AB* or *VPS37ABC* knockdown we did not find prototypical drivers of tumorigenesis but rather cell growth inhibitors, such as *CDKN1A/p21*, *CDKN2B/p14<sup>INK4B</sup>*, and



490 *CDKN2D/p19<sup>INK4D</sup>*. As a consequence we observed decreased ability of CRC cells to progress  
491 over cell cycle phases that resulted in the inhibition of proliferation and colony forming ability.  
492 Our results from Vps37ABC-depleted cells reinforce the notion that knockdown of other  
493 ESCRT-I components, such as *TSG101*, *VPS28* and *UBAP1*, induces cell cycle arrest and halts  
494 cell proliferation (Krempler et al., 2002; Miller et al., 2018; Morita et al., 2007). Here, we also  
495 demonstrate that the degree of cell growth impairment depends primarily on the perturbed  
496 expression of *VPS37A* and whether it is silenced on its own or in combination with other  
497 paralogs. To our knowledge, expression of neither *VPS37B* nor *VPS37C* has been related to  
498 cancer growth but rather to virus release and infectivity (Stuchell et al., 2004). A vast majority of  
499 CRC cell lines tested within the DepMap project (Behan et al., 2019) showed no or only slight  
500 changes in cell fitness upon RNAi-mediated depletion of *VPS37A* or *VPS37B* (*VPS37C* has not  
501 been tested with this technology). Noteworthy, CRISPR-Cas9-mediated knockout of *VPS37A*  
502 markedly decreased RKO and DLD1 cell fitness, whilst the effects of *VPS37B* and *VPS37C* were  
503 less deleterious. Observations made within the DepMap project support the results of our colony  
504 formation and proliferation assays and point to distinct effects of long- and short-term loss of  
505 *VPS37* paralogs. Although our data suggest the negative impact of Vps37 paralogs (co-)depletion  
506 on cancer cell growth, we postulate that the effect of their CRC-associated reduction is more  
507 nuanced. Previous studies revealed that loss of chromosome 8p, where *VPS37A* is located,  
508 promotes tumor growth (Cai et al., 2016; Xue et al., 2012). Decreased expression of *VPS37*  
509 paralogs may be particularly beneficial for cells of advanced stage CRC as RNAi-mediated  
510 silencing of *VPS37A* promoted the resistance of prostate and breast cancer cells to  
511 chemotherapeutics (Sun et al., 2017; Yang et al., 2016). Our interrogation of TCGA expression  
512 data did not reveal increased transcription of *CDKN1A*, *CDKN2B* and *CDKN2D* in the advanced  
513 stages of CRC patients. Notably, this cohort displayed only reduced expression of *VPS37B* but  
514 not *VPS37A*, which at least in part might explain lack of changes in *CDKN* expression (Table  
515 S6). Thus, we postulate that the impact of *VPS37* paralog loss on cancer cell growth warrants  
516 further studies in a subset of patients with decreased expression of both *VPS37A* and *VPS37B*.

517 The pronounced inhibition of cell growth *in vitro* upon Vps37AB and Vps37ABC depletion  
518 correlated with activation of inflammatory and stress signaling mediated by NF- $\kappa$ B and MAPK.  
519 These cellular responses induced upon silencing of *VPS37* paralogs can be viewed as another

520 example of sterile inflammation which resembles stress reactions caused by intracellular  
521 dysfunction of numerous membrane organelles, such as malfunctioning mitochondria, ER or  
522 endosomes (Keestra-Gounder et al., 2016; Maminska et al., 2016; West et al., 2015). Although  
523 Vps37B depletion did not promote inflammatory gene transcription in CRC cell lines, the subset  
524 of advanced stage CRC patients in the TCGA dataset with decreased *VPS37B* expression showed  
525 elevated mRNA abundance of *CXCL8* and *ICAMI* (Table S6). In our *in vitro* experimental  
526 setting, expression of these genes was increased only upon concurrent knockdown of either  
527 *VPS37AB* or *VPS37ABC*. If a subgroup of CRC patients with loss of both *VPS37A* and *VPS37B*  
528 was identified, it would be worth testing whether they display an inflammatory phenotype that  
529 could be modulated pharmacologically. However, inflammatory gene expression in advanced  
530 stage CRC patients is likely a result of multiple lesions accumulated in the course of disease  
531 progression. In addition to the expression of several NF- $\kappa$ B-dependent cytokines that clustered to  
532 processes related to (chemo-)taxis of immune system cells, *VPS37AB* and *VPS37ABC*  
533 knockdown cells produced high levels of the cell cycle inhibitor p21. Although several papers  
534 described NF- $\kappa$ B as a regulator of *CDKN1A*/p21 expression leading to cell cycle arrest in normal  
535 and cancer cells (Basile et al., 2003; Hinata et al., 2003; Nicolae et al., 2018; Wuerzberger-Davis  
536 et al., 2005), our data point to a different mechanism. Plausibly, it involves the release of  
537 Tsg101-mediated repression of the *CDKN1A* promoter (Lin et al., 2013), which in our study  
538 correlated with ESCRT-I destabilization after concurrent depletion of Vps37 proteins.  
539 Alternatively, ESCRT-I destabilization upon co-depletion of Vps37 proteins might induce p53-  
540 driven transcription of *CDKN1A* (El-Deiry, 2003). On the other hand, the p21 protein was shown  
541 to regulate the NF- $\kappa$ B pathway in macrophages (Rackov et al., 2016; Trakala et al., 2009), but  
542 we excluded that a similar mechanism occurs in CRC cells. Thus, we concluded that  
543 inflammatory response induction and inhibition of cell growth after concurrent *VPS37* paralog  
544 silencing are two independent and parallel processes.

545 The most important finding of this study is that differential depletion of Vps37 proteins elicits  
546 distinct effects on ESCRT-I subunit stability which align with the type and magnitude of  
547 transcriptional responses. Our data reinforce the notion that Vps37 proteins dictate the  
548 incorporation of UBAP-1, Mvb12A, and Mvb12B leading to the assembly of distinct ESCRT-I  
549 complexes, which could be functionally non-redundant. More specifically, our data indicate a



550 partnering preference of Vps37A for UBAP-1 and Vps37B for Mvb12A. This is in line with  
551 previous studies on the ESCRT-I stability, which contradicted the stochastic association of  
552 ESCRT-I components (Wunderley et al., 2014). We extended these studies showing that  
553 concurrent knockdown of all *VPS37* paralogs leads to the nearly complete destabilization of  
554 remaining ESCRT-I subunits, resembling effects achieved upon either *TSG101* or *VPS28*  
555 silencing. It also explains why we observe similar effects on cell homeostasis, namely induction  
556 of inflammatory response and cell growth inhibition, upon knockdown of *TSG101* and  
557 concurrent silencing of *VPS37* paralogs and overall similarities in transcriptional responses  
558 (Brankatschk et al., 2012; Maminska et al., 2016; Miller et al., 2018). The degree of ESCRT-I  
559 destabilization after (co-)silencing of *VPS37* paralogs correlates with the type and magnitude of  
560 transcriptional responses; however, the precise mechanism remains to be determined.  
561 Destabilization of Vps37 proteins has been well documented upon Tsg101 depletion (Bache et  
562 al., 2004; Stefani et al., 2011; Stuchell et al., 2004; Wunderley et al., 2014). Here, we observed  
563 mild but distinct transcriptional alterations after either Vps37B or Vps37C depletion that may  
564 result from their partly overlapping functions. Both proteins possess the PRR domain and may  
565 share similar binding partners. Indeed, using the BioGRID database (Oughtred et al., 2019) we  
566 found that both Vps37B and Vps37C have large and partially overlapping interactomes, whilst  
567 Vps37A bereft of PRR has only a few interacting proteins. Thus, *VPS37A* as the only paralog  
568 encoding the UEV domain might execute functions that cannot be taken over by any other family  
569 member. As a consequence, its depletion induces a distinct set of genes than those expressed  
570 after knockdown of either *VPS37B* or *VPS37C*. Noteworthy, at least under some conditions, the  
571 cell can very well compensate for the loss of a single *VPS37* paralog as illustrated by our RNA-  
572 Seq analysis. On the other hand, concurrent silencing of either *VPS37AB* or *VPS37ABC* evokes  
573 profound transcriptional alterations that we believe, by similarity to Tsg101 or Vps28 depletion,  
574 arise from adverse effects of non-degraded plasma membrane proteins and alterations in protein  
575 networks that may contribute to prolonged oncogenic signaling (Maminska et al., 2016). In the  
576 context of cancer, ESCRT-I destabilization after concurrent Vps37 depletion could result in more  
577 adverse tumor phenotype. This notion is consistent with our transcriptomic analysis of CRC cells  
578 depleted of Vps37 proteins, which identified processes related to cell migration, growth and  
579 signaling. Downregulation of ESCRT-I components was shown *in vitro* to prolong epidermal

580 growth factor signaling, sensitize cells to low doses of transforming growth factor, as well as  
581 promote cell invasion and migration through the process of epithelial to mesenchymal transition  
582 (Miller et al., 2018; Yang et al., 2016).

583 In summary, we established that ESCRT-I subunit destabilization after co-depletion of Vps37  
584 proteins evokes profound cellular stress manifested by a sterile inflammatory response and cell  
585 growth arrest. Our findings also revealed potential vulnerabilities of CRC cells with reduced  
586 levels of *VPS37A* and *VPS37B* that may be more susceptible to chemotherapeutics and  
587 pharmacological modulators of inflammatory response. We also identified candidates with  
588 known functions in endocytosis, beyond *VPS37* paralogs, whose expression is changed in CRC  
589 and thus warrants further investigation in the context of cancer cell pathophysiology.

590

## 591 **MATERIAL AND METHODS**

### 592 **Cell culture**

593 Human DLD1 (CCL-221) and RKO (CRL-2577) cell lines were obtained from American Type  
594 Culture Collection (ATCC). DLD1 were cultured in Dulbecco's modified Eagle's medium  
595 (DMEM, Sigma-Aldrich, M2279) supplemented with 10% (v/v) fetal bovine serum (FBS,  
596 Sigma-Aldrich, F7524) and 2 mM L-Glutamine (Sigma-Aldrich, G7513). RKO were maintained  
597 in Eagle's minimum essential medium (EMEM, ATCC, 30-2003) supplemented with 10% (v/v)  
598 FBS. Both cell lines were passaged using 0.05% Trypsin+EDTA (Sigma-Aldrich, T4049). Cells  
599 were cultured in an incubator at 37°C in a humidified atmosphere containing 5% CO<sub>2</sub>. During  
600 the study, cells were regularly tested for mycoplasma and the identities of DLD1 and RKO were  
601 confirmed by short tandem repeat (STR) profiling performed by the ATCC Cell Authentication  
602 Service.

603

### 604 **Cell transfection**

605 Cells were either forward- or reverse-transfected with siRNAs using Lipofectamine RNAiMAX  
606 transfection reagent according to the manufacturer's instructions (Thermo Fisher Scientific,  
607 13778150). The concentration of single siRNA duplex used for transfection was 20 nM. In

608 experiments with simultaneous knockdown of two, three, and four genes, the total concentration  
609 of siRNA was 40 nM, 60 nM, and 80 nM, respectively and the proportion of individual siRNAs  
610 duplexes was kept equal. The following PreDesigned or Validated Ambion Silencer Select  
611 siRNAs (Thermo Fisher Scientific) were used: Negative Control No. 1 (siNC#1, 4390843) and  
612 Negative Control No. 2 (siNC#2, 4390846); on-target siVPS37A#1 (s44037), siVPS37A#2  
613 (s44038), siVPS37B#1 (s36177), siVPS37B#2 (s36178), siVPS37C#1 (s30059), siVPS37C#2  
614 (s30060), siRELA (s11916), siCHUK (s3066), siIKBKB (s7263), siCDKN1A#1 (s415),  
615 siCDKN1A#2 (s417), siTSG101#1 (s14439), siTSG101#2 (s14440), siVPS28#1 (s27577),  
616 siVPS28#2 (s27579), siUBAP1#1 (s27812), siUBAP1#2 (s27813), siMVB12A#1 (s41121),  
617 siMVB12A#2 (s41122), siMVB12B#1 (s40157), siMVB12B#2 (s40158). Additionally, two  
618 custom-ordered Silencer Select duplexes were used: Negative Control No. 3 (NC3, sense strand  
619 5'->3' UACGACCGGUCUAUCGUAGtt, antisense strand 5'->3'  
620 CUACGAUAGACCGGUCGUAtt) and Negative Control No. 4 (NC4, sense strand 5'->3'  
621 UUCUCCGAACGUGUCACGUtt, antisense strand 5'->3' ACGUGACACGUUCGGAGAAAtt).  
622 The composition of siRNA mixes in experiments with individual and concurrent gene silencing  
623 is listed in Table S7.

624

### 625 **Transcriptome analysis by RNA sequencing (RNA-Seq)**

626 Cells were plated in 12-well plate format at the density of 60,000 cells/ml in 1 of medium. After  
627 16-24 h cells were left non-transfected or differentially transfected according to the forward  
628 transfection protocol. 72 h later, cells were washed with PBS, and the cell pellet was collected.  
629 Sequencing libraries were generated using Ion AmpliSeq Transcriptome Human Gene  
630 Expression Panel (ThermoFisher Scientific). Sequencing was performed using Ion Proton  
631 instrument with 7 or 8 samples per chip with Ion PI Hi-Q Sequencing 200 Kit (ThermoFisher  
632 Scientific). Reads were aligned to the hg19 AmpliSeq Transcriptome ERCC v1 with Torrent  
633 Mapping Alignment Program (version 5.0.4, ThermoFisher Scientific). Transcripts were  
634 quantified with HTseq-count (version 0.6.0) run with default settings (Anders et al., 2015).

635 Gene level differential expression analysis was performed using the R package DESeq2 (version  
636 1.18.1; (Love et al., 2014)) for genes with at least 100 counts across conditions and by taking

637 into the account the batch effect and applying the following contrasts ( $\alpha = 0.05$ ): NT (non-  
638 transfected) versus siCTRL#1, NT versus siVPS37A#1, NT versus siVPS37B#1, NT versus  
639 siVPS37C#1, NT versus siVPS37AB#1, NT versus siVPS37AC#1, NT versus siVPS37BC#1,  
640 NT versus siVPS37ABC#1, siCTRL#1-T versus siVPS37A#1, siCTRL#1-T versus  
641 siVPS37B#1, siCTRL#1-T versus siVPS37C#1, siCTRL#1-T versus siVPS37AB#1, siCTRL#1-  
642 T versus siVPS37AC#1, siCTRL#1-T versus siVPS37BC#1, siCTRL#1-T versus  
643 siVPS37ABC#1. We excluded non-protein coding genes from downstream analysis.

644 The overlap for different silencing conditions and normalization contrasts was visualized using  
645 the VennDiagram package (version 1.6.20). The genes, which overlapped for on-target siRNAs  
646 normalized against either NT or siCTRL#1- transfected patterns, were subjected to GO analysis  
647 of biological processes and Reactome pathway analysis using clusterProfiler (version 3.6.0; (Yu  
648 et al., 2012)) and ReactomePA R-packages (version 3.8; (Yu and He, 2016)) taking advantage of  
649 enrichGO and enrichPathway functions, respectively. All enrichment p-values in GO analysis  
650 were corrected for multiple testing using the Benjamini-Hochberg method and only genes with  
651 adjusted p-value  $<0.05$  were considered significant. The minimal and maximal sizes of gene  
652 clusters were set to 10 and 500, respectively. Redundant terms were removed by means of the  
653 simplify function with cutoff 0.6. Count data were transformed using the Transcript Per Million  
654 (TPM) and scaled across conditions (Z-score). Differentially expressed genes binned in the  
655 selected GO processes were used for hierarchical clustering, which was performed on Euclidean  
656 distances using Ward's algorithm. Heatmaps of differentially expressed genes were visualized  
657 using ComplexHeatmap (version 1.17.1; (Gu et al., 2016)). All calculations were performed in R  
658 version 3.4.4 (<https://www.R-project.org>).

659 The code for the present analysis is available on GitHub  
660 ([https://github.com/kkolmus/VPS37\\_RNA-Seq](https://github.com/kkolmus/VPS37_RNA-Seq)). RNA-Seq data have been deposited at Gene  
661 Expression Omnibus (GEO) under the accession code: GSE152195.

662

### 663 **Clonogenic assay**

664 Non-transfected cells or cells subjected to reverse transfection with different siRNAs were  
665 seeded at the density of 1000 cells per well in a 6-well plate format and cultured for 14 days to

666 form colonies. For staining, colonies were washed with PBS, fixed for 5 min in a 3:1 (v/v)  
667 solution of acetic acid:methanol, and incubated for 15 min in 0.2% crystal violet solution in 70%  
668 ethanol. The whole procedure was performed at room temperature. Plates with colonies were  
669 scanned using the Odyssey Infrared System (LI-COR, Biosciences). Acquired images were  
670 analyzed as described before (Guzman et al., 2014). Data are expressed as the percentage  
671 staining intensity displayed by non-transfected cells.

672

### 673 **Proliferation assay**

674 1500 cells were left non-transfected or reverse-transfected with different siRNAs in a 96-well  
675 plate format and let proliferate for 120 h. BrdU Cell Proliferation ELISA assay (Roche,  
676 11647229001) was used to assess the proliferation of RKO and DLD1 cells according to the  
677 manufacturer's instructions with the following modifications: BrdU reagent was added 4 h prior  
678 to cell fixation, 100 µl of substrate solution was added for 5 min followed by addition of 50 µl of  
679 1 M HCl. The colorimetric signal was detected at 450 nm using the Tecan Sunrise Microplate  
680 Reader system with the Magellan v. 6.6 software. Data are expressed as the percentage of  
681 proliferating, non-transfected cells.

682

### 683 **Western blotting and densitometry analysis**

684 Cells were plated in either 6- or 12-well plate format at the density of 60,000 cells/ml in 1 and 2  
685 ml of medium, respectively. After 16-24 h cells were left non-transfected or differentially  
686 transfected according to the forward transfection protocol. 72 h later, cells were lysed in RIPA  
687 buffer (1% Triton X-100, 0.5% sodium deoxycholate, 0.1% SDS, 50 mM Tris pH 7.4, 150 mM  
688 NaCl, 0.5 mM EDTA) supplemented with protease inhibitor cocktail (6 µg/ml chemostatin, 0.5  
689 µg/ml leupeptin, 10 µg/ml antipain, 2 µg/ml aprotinin, 0.7 µg/ml pepstatin A, 10 µg/ml 4-  
690 amidinophenylmethanesulfonyl fluoride hydrochloride; Sigma-Aldrich) and phosphatase  
691 inhibitor cocktails 2 and 3 (P5726 and P0044, Sigma-Aldrich). Protein concentration was  
692 determined using the BCA Protein Assay Kit (Thermo Fisher Scientific, 23225). 25-30 µg of  
693 total protein per sample was resolved on 12 or 15% SDS-PAGE, transferred onto a nitrocellulose  
694 membrane (Amersham Hybond, GE Healthcare Life Science, 10600002), blocked with 5% milk

695 in PBS with 1% Tween, probed first with specific primary and then secondary antibodies, and  
696 imaged using the detection solution (BioRad, 170-5061) and ChemiDoc imaging system (Bio-  
697 Rad). All primary antibodies are listed in Table S8. Secondary horseradish peroxidase-  
698 conjugated anti-mouse (315-005-008), anti-rabbit (111-035-144) and anti-goat (305-035-046)  
699 antibodies were from Jackson ImmunoResearch and were used at working dilution 1:10,000.  
700 Densitometry of protein bands was carried out using ImageJ software (Schneider et al., 2012).  
701 p65 was used as the loading control for quantification of phosphorylated p65. Vinculin was used  
702 as a loading control in all other experiments. Results are presented as fold change compared to  
703 non-transfected cells.

704

### 705 **Quantitative Real-Time Polymerase Chain Reaction (qRT-PCR)**

706 Cells were seeded in a 12-well plate format at the density of 60,000 cells/ml in 1 ml of medium.  
707 After 16-24 h cells were left non-transfected or differentially transfected according to the  
708 forward transfection protocol. 72 h later, total RNA was isolated with High Pure Isolation Kit  
709 (Roche, 11828665001). 500 ng of total RNA was subjected for cDNA synthesis. M-MLV,  
710 random nonamers and oligo(dT)<sub>23</sub> (Sigma-Aldrich, M1302, R7647, and O4387, respectively)  
711 were used for cDNA synthesis according to the manufacturer's instructions. Expression of genes  
712 of interest was measured using primers designed with the NCBI Primer designing tool and  
713 custom-synthesized by Sigma-Aldrich. We list primers used in the present study (Table S9).  
714 Real-Time cDNA amplification was performed with the Kapa Sybr Fast qPCR Kit  
715 (KapaBiosystems, KK4618). Fluorescence was monitored using the 7900HT Fast Real-Time  
716 PCR thermocycler (Applied Biosystems). Expression of each gene was normalized to either  
717 expression of the *ACTB* ( $\beta$ -actin) or *GAPDH* (glyceraldehyde 3-phosphate dehydrogenase)  
718 reference genes. Results are presented as fold change compared to non-transfected cells. For  
719 clarity, the Y-axis is interrupted in some cases.

720

### 721 **Analysis of expression levels of VPS37 paralogs in healthy and colorectal cancer (CRC)** 722 **samples using qRT-PCR**

723 Samples of the normal colon (n=24) and adenocarcinoma (n=26) had been collected for the  
724 purpose of previous studies (Mikula et al., 2011; Skrzypczak et al., 2010). In order to determine  
725 the abundance of *VPS37A* and *VPS37B* transcripts, qRT-PCR was performed as described before  
726 (Mikula et al., 2011; Skrzypczak et al., 2010). The sequences of primers for *VPS37A* and  
727 *VPS37B* are listed in Table S9.

728

### 729 **Flow cytometry analysis**

730 Cells were seeded in a 6-well plate format at the density of 60,000 cells/ml in 2 ml of medium.  
731 After 16-24 h cells were left non-transfected or differentially transfected according to the  
732 forward transfection protocol. 96 h post-transfection cells were briefly washed with PBS,  
733 harvested with trypsin+EDTA, washed twice with PBS, and fixed for 24 h in ice-cold 70%  
734 ethanol. Washed cells were then incubated first with extraction buffer (4 mM citric acid in 0.2 M  
735 Na<sub>2</sub>HPO<sub>4</sub>) for 5 min at room temperature, and next with staining solution (3.8 mM sodium  
736 citrate, 50 µg/ml propidium iodide (PI) and 0.5 mg/ml RNase A) for 30 min at room temperature.  
737 Analysis of cells was performed on the BD LSRFortessa flow cytometer (Bekton Dickinson). A  
738 total of 10,000 cells from single cell gate were counted for each transfection condition. Flow  
739 cytometry data were plotted and analyzed by FlowJo (Bekton Dickinson) and ModFit LT (Verity  
740 Software House) software. Data is presented as percentage of analyzed cells in the given cell  
741 cycle phase.

742

### 743 **Immunohistochemistry (IHC) and analyses of normal and CRC samples**

744 The study protocol for analysis of protein levels of Vps37A and Vps37B in human normal colon  
745 and CRC samples was approved by the Bioethics Committee of the Maria Skłodowska-Curie  
746 National Research Institute of Oncology in Warsaw (decision no. 40/2017). Informed consent  
747 was obtained from all subjects. The experiment conformed to the principles set out in the WMA  
748 Declaration of Helsinki and the Department of Health and Human Services Belmont Report.  
749 High-density tissue microarrays were constructed from formalin-fixed, paraffin-embedded  
750 diagnostic samples of 100 pairs of treatment-naïve CRC tissues and matched normal colon  
751 samples from the collection of the Maria Skłodowska-Curie National Research Institute of



752 Oncology in Warsaw. IHC was performed using automated immunohistochemical stainer (Dako  
753 Denmark A/S) and specific anti-VPS37A and anti-VPS37B antibodies listed in Table S8. The  
754 EnVision Detection System (Agilent) was used for detection. Samples were reviewed for the  
755 abundance of Vps37 proteins in normal and neoplastic tissue by two pathologists who were  
756 blinded to the outcome. A semi-quantitative method was applied for IHC evaluation, involving a  
757 scoring system based on the staining intensity: 0 – no staining, 1+ – weak, 2+ – intermediate, 3+  
758 – strong staining. Staining homogeneity was above 90%.

759

### 760 **TCGA data analysis**

761 Clinicopathological and transcriptional profiles from the two TCGA cohorts: rectum  
762 adenocarcinoma (READ) and colon adenocarcinoma (COAD) were retrieved using the  
763 TCGAblinks package (Colaprico et al., 2016). READ and COAD datasets were analyzed  
764 together as a previous study showed a major overlap in their expression patterns (Weinstein et  
765 al., 2013). The present analysis encompassed only matched normal-tumor tissue samples for  
766 which clinicopathological data were available. 31 patients fulfilled the latter criterion. 19 of these  
767 patients were assigned to the early stage group encompassing stages I and II, and 12 were  
768 assigned to the advanced stage group encompassing stages III and IV. Matching TCGA  
769 sequencing data acquired using the Illumina HiSeq platform were used. Differential gene  
770 expression was performed with the default settings on count data taking into account correction  
771 of batch effect relying on the inter-plate variation. Only transcripts whose gene counts exceeded  
772 50 were selected for downstream analysis. Volcano plots of differentially expressed genes were  
773 prepared with ggplot2 (CRAN available package). Heatmaps of differentially expressed genes  
774 were visualized using ComplexHeatmap (version 1.17.1; (Gu et al., 2016)). The overlap between  
775 differentially expressed genes was visualized using the VennDiagram package (CRAN available  
776 package). All calculations were performed in R version 3.6.1 (<https://www.R-project.org>). The  
777 code for the present analysis is available on GitHub  
778 ([https://github.com/kkolmus/TCGA\\_transcriptomic\\_proj](https://github.com/kkolmus/TCGA_transcriptomic_proj)).

779

### 780 **Statistical analysis**



781 Data are shown as mean  $\pm$  standard deviation of at least three independent biological  
782 experiments. For qRT-PCR and BrdU, samples were assayed in technical triplicates. Statistical  
783 analysis was performed using the GraphPad Prism 6 software. Experiments with normal  
784 distribution were analyzed using either Student's t-test or one-way ANOVA followed by  
785 Bonferroni's multiple comparison test. In the case of non-normal distribution Mann-Whitney U-  
786 test was applied. Analysis of categorical data was performed using Fisher's exact test. The  
787 significance of mean comparison is annotated as follows: ns, non-significant ( $P \geq 0.05$ ),  $*P < 0.05$ ,  
788  $**P < 0.01$ ,  $***P < 0.001$ ,  $****P < 0.0001$ . Results were considered significant when  $P < 0.05$ . No  
789 statistical methods were used to predetermine sample size.

790 **References**

791 **Aibar, S., Gonzalez-Blas, C. B., Moerman, T., Huynh-Thu, V. A., Imrichova, H.,**  
792 **Hulselmans, G., Rambow, F., Marine, J. C., Geurts, P., Aerts, J. et al. (2017).** SCENIC:  
793 single-cell regulatory network inference and clustering. *Nat Methods* **14**, 1083-1086.

794 **Alfred, V. and Vaccari, T. (2016).** When membranes need an ESCRT: endosomal  
795 sorting and membrane remodelling in health and disease. *Swiss Med Wkly* **146**, w14347.

796 **Anders, S., Pyl, P. T. and Huber, W. (2015).** HTSeq--a Python framework to work with  
797 high-throughput sequencing data. *Bioinformatics* **31**, 166-9.

798 **Bache, K. G., Slagsvold, T., Cabezas, A., Rosendal, K. R., Raiborg, C. and**  
799 **Stenmark, H. (2004).** The growth-regulatory protein HCRP1/hVps37A is a subunit of  
800 mammalian ESCRT-I and mediates receptor down-regulation. *Mol Biol Cell* **15**, 4337-46.

801 **Banach-Orlowska, M., Jastrzebski, K., Cendrowski, J., Maksymowicz, M.,**  
802 **Wojciechowska, K., Korostynski, M., Moreau, D., Gruenberg, J. and Miaczynska, M.**  
803 (2018). The topology of the lymphotoxin beta receptor that accumulates upon endolysosomal  
804 dysfunction dictates the NF-kappaB signaling outcome. *J Cell Sci* **131**.

805 **Barbieri, E., Di Fiore, P. P. and Sigismund, S. (2016).** Endocytic control of signaling at  
806 the plasma membrane. *Curr Opin Cell Biol* **39**, 21-7.

807 **Basile, J. R., Eichten, A., Zacny, V. and Munger, K. (2003).** NF-kappaB-mediated  
808 induction of p21(Cip1/Waf1) by tumor necrosis factor alpha induces growth arrest and  
809 cytoprotection in normal human keratinocytes. *Mol Cancer Res* **1**, 262-70.

810 **Behan, F. M., Iorio, F., Picco, G., Goncalves, E., Beaver, C. M., Migliardi, G.,**  
811 **Santos, R., Rao, Y., Sassi, F., Pinnelli, M. et al. (2019).** Prioritization of cancer therapeutic  
812 targets using CRISPR-Cas9 screens. *Nature* **568**, 511-516.

813 **Bishop, N., Horman, A. and Woodman, P. (2002).** Mammalian class E vps proteins  
814 recognize ubiquitin and act in the removal of endosomal protein-ubiquitin conjugates. *J Cell Biol*  
815 **157**, 91-101.

- 816 **Bonelli, P., Tuccillo, F. M., Borrelli, A., Schiattarella, A. and Buonaguro, F. M.**  
817 (2014). CDK/CCN and CDKI alterations for cancer prognosis and therapeutic predictivity.  
818 *Biomed Res Int* **2014**, 361020.
- 819 **Brankatschk, B., Wichert, S. P., Johnson, S. D., Schaad, O., Rossner, M. J. and**  
820 **Gruenberg, J.** (2012). Regulation of the EGF transcriptional response by endocytic sorting. *Sci*  
821 *Signal* **5**, ra21.
- 822 **Buser, D. P., Ritz, M. F., Moes, S., Tostado, C., Frank, S., Spiess, M., Mariani, L.,**  
823 **Jeno, P., Boulay, J. L. and Hutter, G.** (2019). Quantitative proteomics reveals reduction of  
824 endocytic machinery components in gliomas. *EBioMedicine* **46**, 32-41.
- 825 **Cai, Y., Crowther, J., Pastor, T., Abbasi Asbagh, L., Baietti, M. F., De Troyer, M.,**  
826 **Vazquez, I., Talebi, A., Renzi, F., Dehairs, J. et al.** (2016). Loss of Chromosome 8p Governs  
827 Tumor Progression and Drug Response by Altering Lipid Metabolism. *Cancer Cell* **29**, 751-766.
- 828 **Chen, F., Deng, J., Liu, X., Li, W. and Zheng, J.** (2015). HCRP-1 regulates cell  
829 migration and invasion via EGFR-ERK mediated up-regulation of MMP-2 with prognostic  
830 significance in human renal cell carcinoma. *Sci Rep* **5**, 13470.
- 831 **Chen, F., Wu, J., Teng, J., Li, W., Zheng, J. and Bai, J.** (2020). HCRP-1 regulates cell  
832 migration, invasion and angiogenesis via Src/ FAK signaling in human prostate cancer. *Int J Biol*  
833 *Sci* **16**, 342-352.
- 834 **Chen, F., Zhang, L., Wu, J., Huo, F., Ren, X., Zheng, J. and Pei, D.** (2018). HCRP-1  
835 regulates EGFR-AKT-BIM-mediated anoikis resistance and serves as a prognostic marker in  
836 human colon cancer. *Cell Death Dis* **9**, 1176.
- 837 **Colaprico, A., Silva, T. C., Olsen, C., Garofano, L., Cava, C., Garolini, D., Sabedot,**  
838 **T. S., Malta, T. M., Pagnotta, S. M., Castiglioni, I. et al.** (2016). TCGAblinks: an  
839 R/Bioconductor package for integrative analysis of TCGA data. *Nucleic Acids Res* **44**, e71.
- 840 **Di Fiore, P. P. and von Zastrow, M.** (2014). Endocytosis, signaling, and beyond. *Cold*  
841 *Spring Harb Perspect Biol* **6**.
- 842 **Dou, Y., Cha, D. J., Franklin, J. L., Higginbotham, J. N., Jeppesen, D. K., Weaver,**  
843 **A. M., Prasad, N., Levy, S., Coffey, R. J., Patton, J. G. et al.** (2016). Circular RNAs are down-

844 regulated in KRAS mutant colon cancer cells and can be transferred to exosomes. *Sci Rep* **6**,  
845 37982.

846 **Du, Y., Wang, P., Sun, H., Yang, J., Lang, X., Wang, Z., Zang, S., Chen, L., Ma, J.**  
847 **and Sun, D.** (2016). HCRP1 is downregulated in non-small cell lung cancer and regulates  
848 proliferation, invasion, and drug resistance. *Tumour Biol*.

849 **El-Deiry, W. S.** (2003). The role of p53 in chemosensitivity and radiosensitivity.  
850 *Oncogene* **22**, 7486-95.

851 **Floyd, S. and De Camilli, P.** (1998). Endocytosis proteins and cancer: a potential link?  
852 *Trends Cell Biol* **8**, 299-301.

853 **Fu, F., Wan, X., Wang, D., Kong, Z., Zhang, Y., Huang, W., Wang, C., Wu, H. and**  
854 **Li, Y.** (2018). MicroRNA-19a acts as a prognostic marker and promotes prostate cancer  
855 progression via inhibiting VPS37A expression. *Oncotarget* **9**, 1931-1943.

856 **Gargalionis, A. N., Karamouzis, M. V., Adamopoulos, C. and Papavassiliou, A. G.**  
857 (2015). Protein trafficking in colorectal carcinogenesis-targeting and bypassing resistance to  
858 currently applied treatments. *Carcinogenesis* **36**, 607-15.

859 **Gingras, M. C., Kazan, J. M. and Pause, A.** (2017). Role of ESCRT component HD-  
860 PTP/PTPN23 in cancer. *Biochem Soc Trans* **45**, 845-854.

861 **Gu, Z., Eils, R. and Schlesner, M.** (2016). Complex heatmaps reveal patterns and  
862 correlations in multidimensional genomic data. *Bioinformatics* **32**, 2847-9.

863 **Guzman, C., Bagga, M., Kaur, A., Westermarck, J. and Abankwa, D.** (2014).  
864 ColonyArea: an ImageJ plugin to automatically quantify colony formation in clonogenic assays.  
865 *PLoS One* **9**, e92444.

866 **Hayden, M. S. and Ghosh, S.** (2008). Shared principles in NF-kappaB signaling. *Cell*  
867 **132**, 344-62.

868 **Hinata, K., Gervin, A. M., Jennifer Zhang, Y. and Khavari, P. A.** (2003). Divergent  
869 gene regulation and growth effects by NF-kappa B in epithelial and mesenchymal cells of human  
870 skin. *Oncogene* **22**, 1955-64.

- 871           **Hoesel, B. and Schmid, J. A.** (2013). The complexity of NF-kappaB signaling in  
872 inflammation and cancer. *Mol Cancer* **12**, 86.
- 873           **Hurley, J. H.** (2015). ESCRTs are everywhere. *EMBO J* **34**, 2398-407.
- 874           **Keestra-Gounder, A. M., Byndloss, M. X., Seyffert, N., Young, B. M., Chavez-**  
875 **Arroyo, A., Tsai, A. Y., Cevallos, S. A., Winter, M. G., Pham, O. H., Tiffany, C. R. et al.**  
876 (2016). NOD1 and NOD2 signalling links ER stress with inflammation. *Nature* **532**, 394-7.
- 877           **Krempler, A., Henry, M. D., Triplett, A. A. and Wagner, K. U.** (2002). Targeted  
878 deletion of the Tsg101 gene results in cell cycle arrest at G1/S and p53-independent cell death. *J*  
879 *Biol Chem* **277**, 43216-23.
- 880           **Kwong, K. Y., Bloom, G. C., Yang, I., Boulware, D., Coppola, D., Haseman, J.,**  
881 **Chen, E., McGrath, A., Makusky, A. J., Taylor, J. et al.** (2005). Synchronous global  
882 assessment of gene and protein expression in colorectal cancer progression. *Genomics* **86**, 142-  
883 58.
- 884           **Lai, M. W., Huang, S. F., Lin, S. M., Chen, T. C., Lin, C. Y., Yeh, C. N., Yeh, T. S.,**  
885 **Chen, M. F. and Yeh, C. T.** (2009). Expression of the HCRP1 mRNA in HCC as an  
886 independent predictor of disease-free survival after surgical resection. *Hepatol Res* **39**, 164-76.
- 887           **Ledoux, A. C. and Perkins, N. D.** (2014). NF-kappaB and the cell cycle. *Biochem Soc*  
888 *Trans* **42**, 76-81.
- 889           **Li, L. and Cohen, S. N.** (1996). Tsg101: a novel tumor susceptibility gene isolated by  
890 controlled homozygous functional knockout of allelic loci in mammalian cells. *Cell* **85**, 319-29.
- 891           **Lin, Y. S., Chen, Y. J., Cohen, S. N. and Cheng, T. H.** (2013). Identification of  
892 TSG101 functional domains and p21 loci required for TSG101-mediated p21 gene regulation.  
893 *PLoS One* **8**, e79674.
- 894           **Love, M. I., Huber, W. and Anders, S.** (2014). Moderated estimation of fold change  
895 and dispersion for RNA-seq data with DESeq2. *Genome Biol* **15**, 550.
- 896           **Maminska, A., Bartosik, A., Banach-Orlowska, M., Pilecka, I., Jastrzebski, K.,**  
897 **Zdzalik-Bielecka, D., Castanon, I., Poulain, M., Neyen, C., Wolinska-Niziol, L. et al.** (2016).

898 ESCRT proteins restrict constitutive NF-kappaB signaling by trafficking cytokine receptors. *Sci*  
899 *Signal* **9**, ra8.

900 **Manteghi, S., Gingras, M. C., Kharitidi, D., Galarneau, L., Marques, M., Yan, M.,**  
901 **Cencic, R., Robert, F., Paquet, M., Witcher, M. et al.** (2016). Haploinsufficiency of the  
902 ESCRT Component HD-PTP Predisposes to Cancer. *Cell Rep* **15**, 1893-900.

903 **Mattisek, C. and Teis, D.** (2014). The role of the endosomal sorting complexes required  
904 for transport (ESCRT) in tumorigenesis. *Mol Membr Biol* **31**, 111-9.

905 **Meijer, G. A., Hermsen, M. A., Baak, J. P., van Diest, P. J., Meuwissen, S. G.,**  
906 **Belien, J. A., Hoovers, J. M., Joenje, H., Snijders, P. J. and Walboomers, J. M.** (1998).  
907 Progression from colorectal adenoma to carcinoma is associated with non-random chromosomal  
908 gains as detected by comparative genomic hybridisation. *J Clin Pathol* **51**, 901-9.

909 **Mellman, I. and Yarden, Y.** (2013). Endocytosis and cancer. *Cold Spring Harb*  
910 *Perspect Biol* **5**, a016949.

911 **Mikula, M., Rubel, T., Karczmarski, J., Goryca, K., Dadlez, M. and Ostrowski, J.**  
912 (2011). Integrating proteomic and transcriptomic high-throughput surveys for search of new  
913 biomarkers of colon tumors. *Funct Integr Genomics* **11**, 215-24.

914 **Miller, D. S. J., Bloxham, R. D., Jiang, M., Gori, I., Saunders, R. E., Das, D.,**  
915 **Chakravarty, P., Howell, M. and Hill, C. S.** (2018). The Dynamics of TGF-beta Signaling Are  
916 Dictated by Receptor Trafficking via the ESCRT Machinery. *Cell Rep* **25**, 1841-1855 e5.

917 **Moberg, K. H., Schelble, S., Burdick, S. K. and Hariharan, I. K.** (2005). Mutations in  
918 erupted, the Drosophila ortholog of mammalian tumor susceptibility gene 101, elicit non-cell-  
919 autonomous overgrowth. *Dev Cell* **9**, 699-710.

920 **Morita, E., Sandrin, V., Chung, H. Y., Morham, S. G., Gygi, S. P., Rodesch, C. K.**  
921 **and Sundquist, W. I.** (2007). Human ESCRT and ALIX proteins interact with proteins of the  
922 midbody and function in cytokinesis. *EMBO J* **26**, 4215-27.

923 **Mosesson, Y., Mills, G. B. and Yarden, Y.** (2008). Derailed endocytosis: an emerging  
924 feature of cancer. *Nat Rev Cancer* **8**, 835-50.

- 925 **Nicolae, C. M., O'Connor, M. J., Constantin, D. and Moldovan, G. L. (2018).**  
926 NFKappaB regulates p21 expression and controls DNA damage-induced leukemic  
927 differentiation. *Oncogene* **37**, 3647-3656.
- 928 **Olmos, Y. and Carlton, J. G. (2016).** The ESCRT machinery: new roles at new holes.  
929 *Curr Opin Cell Biol* **38**, 1-11.
- 930 **Oughtred, R., Stark, C., Breitkreutz, B. J., Rust, J., Boucher, L., Chang, C., Kolas,**  
931 **N., O'Donnell, L., Leung, G., McAdam, R. et al. (2019).** The BioGRID interaction database:  
932 2019 update. *Nucleic Acids Res* **47**, D529-D541.
- 933 **Perisanidis, C., Savarese-Brenner, B., Wurger, T., Wrba, F., Huynh, A., Schopper,**  
934 **C., Kornek, G., Selzer, E., Ewers, R., Psyrrri, A. et al. (2013).** HCRP1 expression status is a  
935 significant prognostic marker in oral and oropharyngeal cancer. *Oral Dis* **19**, 206-11.
- 936 **Porther, N. and Barbieri, M. A. (2015).** The role of endocytic Rab GTPases in  
937 regulation of growth factor signaling and the migration and invasion of tumor cells. *Small*  
938 *GTPases* **6**, 135-44.
- 939 **Rackov, G., Hernandez-Jimenez, E., Shokri, R., Carmona-Rodriguez, L., Manes, S.,**  
940 **Alvarez-Mon, M., Lopez-Collazo, E., Martinez, A. C. and Balomenos, D. (2016).** p21  
941 mediates macrophage reprogramming through regulation of p50-p50 NF-kappaB and IFN-beta. *J*  
942 *Clin Invest* **126**, 3089-103.
- 943 **Sadler, J. B. A., Wenzel, D. M., Williams, L. K., Guindo-Martinez, M., Alam, S. L.,**  
944 **Mercader, J. M., Torrents, D., Ullman, K. S., Sundquist, W. I. and Martin-Serrano, J.**  
945 **(2018).** A cancer-associated polymorphism in ESCRT-III disrupts the abscission checkpoint and  
946 promotes genome instability. *Proc Natl Acad Sci U S A* **115**, E8900-E8908.
- 947 **Schmid, S. L. (2017).** Reciprocal regulation of signaling and endocytosis: Implications  
948 for the evolving cancer cell. *J Cell Biol* **216**, 2623-2632.
- 949 **Schneider, C. A., Rasband, W. S. and Eliceiri, K. W. (2012).** NIH Image to ImageJ: 25  
950 years of image analysis. *Nat Methods* **9**, 671-5.
- 951 **Siegel, R. L., Miller, K. D. and Jemal, A. (2018).** Cancer statistics, 2018. *CA Cancer J*  
952 *Clin* **68**, 7-30.

- 953           **Skrzypczak, M., Goryca, K., Rubel, T., Paziewska, A., Mikula, M., Jarosz, D.,**  
954 **Pachlewski, J., Oledzki, J. and Ostrowski, J.** (2010). Modeling oncogenic signaling in colon  
955 tumors by multidirectional analyses of microarray data directed for maximization of analytical  
956 reliability. *PLoS One* **5**.
- 957           **Stefani, F., Zhang, L., Taylor, S., Donovan, J., Rollinson, S., Doyotte, A., Brownhill,**  
958 **K., Bennion, J., Pickering-Brown, S. and Woodman, P.** (2011). UBAP1 is a component of an  
959 endosome-specific ESCRT-I complex that is essential for MVB sorting. *Curr Biol* **21**, 1245-50.
- 960           **Stuchell, M. D., Garrus, J. E., Muller, B., Stray, K. M., Ghaffarian, S., McKinnon,**  
961 **R., Krausslich, H. G., Morham, S. G. and Sundquist, W. I.** (2004). The human endosomal  
962 sorting complex required for transport (ESCRT-I) and its role in HIV-1 budding. *J Biol Chem*  
963 **279**, 36059-71.
- 964           **Sun, L., Lu, J., Ding, S., Bi, D., Ding, K., Niu, Z. and Liu, P.** (2017). HCRP1 regulates  
965 proliferation, invasion, and drug resistance via EGFR signaling in prostate cancer. *Biomed*  
966 *Pharmacother* **91**, 202-207.
- 967           **Szymanska, E., Budick-Harmelin, N. and Miaczynska, M.** (2018). Endosomal "sort"  
968 of signaling control: The role of ESCRT machinery in regulation of receptor-mediated signaling  
969 pathways. *Semin Cell Dev Biol* **74**, 11-20.
- 970           **Szymanska, E., Nowak, P., Kolmus, K., Cybulska, M., Goryca, K., Derezińska-**  
971 **Wolek, E., Szumera-Cieckiewicz, A., Brewinska-Olchowik, M., Grochowska, A., Piwocka,**  
972 **K. et al.** (2020). Synthetic lethality between VPS4A and VPS4B triggers an inflammatory  
973 response in colorectal cancer. *EMBO Mol Med* **12**, e10812.
- 974           **Tanigawa, K., Maekawa, M., Kiyoi, T., Nakayama, J., Kitazawa, R., Kitazawa, S.,**  
975 **Semba, K., Taguchi, T., Akita, S., Yoshida, M. et al.** (2019). SNX9 determines the surface  
976 levels of integrin beta1 in vascular endothelial cells: Implication in poor prognosis of human  
977 colorectal cancers overexpressing SNX9. *J Cell Physiol* **234**, 17280-17294.
- 978           **Taniguchi, K. and Karin, M.** (2018). NF-kappaB, inflammation, immunity and cancer:  
979 coming of age. *Nat Rev Immunol* **18**, 309-324.



980 **Tashima, T.** (2018). Effective cancer therapy based on selective drug delivery into cells  
981 across their membrane using receptor-mediated endocytosis. *Bioorg Med Chem Lett* **28**, 3015-  
982 3024.

983 **Trakala, M., Arias, C. F., Garcia, M. I., Moreno-Ortiz, M. C., Tsilingiri, K.,**  
984 **Fernandez, P. J., Mellado, M., Diaz-Meco, M. T., Moscat, J., Serrano, M. et al.** (2009).  
985 Regulation of macrophage activation and septic shock susceptibility via p21(WAF1/CIP1). *Eur J*  
986 *Immunol* **39**, 810-9.

987 **Vasaikar, S., Huang, C., Wang, X., Petyuk, V. A., Savage, S. R., Wen, B., Dou, Y.,**  
988 **Zhang, Y., Shi, Z., Arshad, O. A. et al.** (2019). Proteogenomic Analysis of Human Colon  
989 Cancer Reveals New Therapeutic Opportunities. *Cell* **177**, 1035-1049 e19.

990 **Vietri, M., Radulovic, M. and Stenmark, H.** (2020). The many functions of ESCRTs.  
991 *Nat Rev Mol Cell Biol* **21**, 25-42.

992 **Weinstein, J. N., Collisson, E. A., Mills, G. B., Shaw, K. R., Ozenberger, B. A.,**  
993 **Ellrott, K., Shmulevich, I., Sander, C. and Stuart, J. M.** (2013). The Cancer Genome Atlas  
994 Pan-Cancer analysis project. *Nat Genet* **45**, 1113-20.

995 **West, A. P., Khoury-Hanold, W., Staron, M., Tal, M. C., Pineda, C. M., Lang, S. M.,**  
996 **Bestwick, M., Duguay, B. A., Raimundo, N., MacDuff, D. A. et al.** (2015). Mitochondrial  
997 DNA stress primes the antiviral innate immune response. *Nature* **520**, 553-7.

998 **Wittinger, M., Vanhara, P., El-Gazzar, A., Savarese-Brenner, B., Pils, D., Anees, M.,**  
999 **Grunt, T. W., Sibilia, M., Holcman, M., Horvat, R. et al.** (2011). hVps37A Status affects  
1000 prognosis and cetuximab sensitivity in ovarian cancer. *Clin Cancer Res* **17**, 7816-27.

1001 **Wood, L. D., Parsons, D. W., Jones, S., Lin, J., Sjoblom, T., Leary, R. J., Shen, D.,**  
1002 **Boca, S. M., Barber, T., Ptak, J. et al.** (2007). The genomic landscapes of human breast and  
1003 colorectal cancers. *Science* **318**, 1108-13.

1004 **Wu, Y., Yang, Y. and Xian, Y. S.** (2019). HCRP1 inhibits cell proliferation and invasion  
1005 and promotes chemosensitivity in esophageal squamous cell carcinoma. *Chem Biol Interact* **308**,  
1006 357-363.

- 1007           **Wuerzberger-Davis, S. M., Chang, P. Y., Berchtold, C. and Miyamoto, S.** (2005).  
1008   Enhanced G2-M arrest by nuclear factor- $\kappa$ B-dependent p21waf1/cip1 induction. *Mol*  
1009   *Cancer Res* **3**, 345-53.
- 1010           **Wunderley, L., Brownhill, K., Stefani, F., Taberero, L. and Woodman, P.** (2014).  
1011   The molecular basis for selective assembly of the UBAP1-containing endosome-specific  
1012   ESCRT-I complex. *J Cell Sci* **127**, 663-72.
- 1013           **Xu, C. Y., Li, Z. J. and Hu, W. Z.** (2017a). Up-regulation of HCRP1 inhibits  
1014   proliferation and invasion in glioma cells via suppressing the ERK and AKT signaling pathways.  
1015   *Biomed Pharmacother* **95**, 31-36.
- 1016           **Xu, H., Miao, Z. F., Wang, Z. N., Zhao, T. T., Xu, Y. Y., Song, Y. X., Huang, J. Y.,**  
1017   **Zhang, J. Y., Liu, X. Y., Wu, J. H. et al.** (2017b). HCRP1 downregulation confers poor  
1018   prognosis and induces chemoresistance through regulation of EGFR-AKT pathway in human  
1019   gastric cancer. *Virchows Arch* **471**, 743-751.
- 1020           **Xu, J., Yang, W., Wang, Q., Zhang, Q., Li, X., Lin, X., Liu, X. and Qin, Y.** (2014).  
1021   Decreased HCRP1 expression is associated with poor prognosis in breast cancer patients. *Int J*  
1022   *Clin Exp Pathol* **7**, 7915-22.
- 1023           **Xu, J., Zhang, X., Wang, H., Ge, S., Gao, T., Song, L., Wang, X., Li, H., Qin, Y. and**  
1024   **Zhang, Z.** (2017c). HCRP1 downregulation promotes hepatocellular carcinoma cell migration  
1025   and invasion through the induction of EGFR activation and epithelial-mesenchymal transition.  
1026   *Biomed Pharmacother* **88**, 421-429.
- 1027           **Xu, Z., Liang, L., Wang, H., Li, T. and Zhao, M.** (2003). HCRP1, a novel gene that is  
1028   downregulated in hepatocellular carcinoma, encodes a growth-inhibitory protein. *Biochem*  
1029   *Biophys Res Commun* **311**, 1057-66.
- 1030           **Xue, W., Kitzing, T., Roessler, S., Zuber, J., Krasnitz, A., Schultz, N., Revill, K.,**  
1031   **Weissmueller, S., Rappaport, A. R., Simon, J. et al.** (2012). A cluster of cooperating tumor-  
1032   suppressor gene candidates in chromosomal deletions. *Proc Natl Acad Sci U S A* **109**, 8212-7.

1033           **Yang, W., Wang, J. G., Wang, Q., Qin, Y., Lin, X., Zhou, D., Ren, K., Hou, C., Xu,**  
1034 **J. and Liu, X.** (2016). Decreased HCRP1 promotes breast cancer metastasis by enhancing  
1035 EGFR phosphorylation. *Biochem Biophys Res Commun* **477**, 222-8.

1036           **Yang, W., Wang, J. G., Xu, J., Zhou, D., Ren, K., Hou, C., Chen, L. and Liu, X.**  
1037 (2017). HCRP1 inhibits TGF-beta induced epithelial-mesenchymal transition in hepatocellular  
1038 carcinoma. *Int J Oncol*.

1039           **Yoshida, T., Kobayashi, T., Itoda, M., Muto, T., Miyaguchi, K., Mogushi, K., Shoji,**  
1040 **S., Shimokawa, K., Iida, S., Uetake, H. et al.** (2010). Clinical omics analysis of colorectal  
1041 cancer incorporating copy number aberrations and gene expression data. *Cancer Inform* **9**, 147-  
1042 61.

1043           **Yu, G. and He, Q. Y.** (2016). ReactomePA: an R/Bioconductor package for reactome  
1044 pathway analysis and visualization. *Mol Biosyst* **12**, 477-9.

1045           **Yu, G., Wang, L. G., Han, Y. and He, Q. Y.** (2012). clusterProfiler: an R package for  
1046 comparing biological themes among gene clusters. *OMICS* **16**, 284-7.

1047           **Zhang, Q., Lenardo, M. J. and Baltimore, D.** (2017). 30 Years of NF-kappaB: A  
1048 Blossoming of Relevance to Human Pathobiology. *Cell* **168**, 37-57.

1049           **Zhu, X., Liu, J., Xu, X., Zhang, C. and Dai, D.** (2015). Genome-wide analysis of  
1050 histone modifications by ChIP-chip to identify silenced genes in gastric cancer. *Oncol Rep* **33**,  
1051 2567-74.

1052

1053

1054 **Acknowledgments**

1055 We thank A. Zeigerer (Helmholtz Zentrum Munchen), D. Zdzalik-Bielecka, J. Cendrowski, A.  
1056 Poświata, and M. Kaczmarek for critical reading of the manuscript. We also thank D. Zdzalik-  
1057 Bielecka (International Institute of Molecular and Cell Biology) for help with pilot FACS  
1058 experiments. We are grateful to A. Paziewska and A. Dąbrowska (Maria Skłodowska-Curie  
1059 National Research Institute of Oncology) for their technical support in RNA-Seq analysis.

1060 **Competing interests**

1061 The authors declare that they have no competing interests.

1062 **Author contributions**

1063 The research was conceived by M. Miączyńska, K.K. and M. Mikula. Funding was acquired by  
1064 M. Miączyńska. Experiments were designed and performed mostly by K.K. P.E., B.S. and E.S.,  
1065 with input from M. Miączyńska, E.S. and crucial help from M. Mikula and K.G. (RNA-Seq),  
1066 E.D-W, A.S-C. and M.P-S. (immunohistochemistry), and MB-O. and K.P. (flow cytometry). The  
1067 manuscript was written by K.K. and M. Miączyńska. Figures were assembled by K.K. with help  
1068 of A.S-C. K.K. and M. Miączyńska supervised the work. All authors approved the manuscript.

1069 **Funding**

1070 This study was financed by TEAM grant (POIR.04.04.00-00-20CE/16-00), K. Piwocka was  
1071 supported by TEAM-TECH Core Facility Plus/2017–2/2 grant (POIR.04.04.00-00-23C2/17-00)  
1072 – both grants from the Foundation for Polish Science co-financed by the European Union under  
1073 the European Regional Development Fund. E. Szymańska was supported by Sonata grant  
1074 (2016/21/D/NZ3/00637) from the National Science Center.

1075 **Data and materials availability**

1076 The RNA-Seq datasets have been deposited to GEO under the accession number: GSE152195  
1077 (<https://www.ncbi.nlm.nih.gov/geo/query/acc.cgi?acc=GSE152195>).

**Fig. 1**

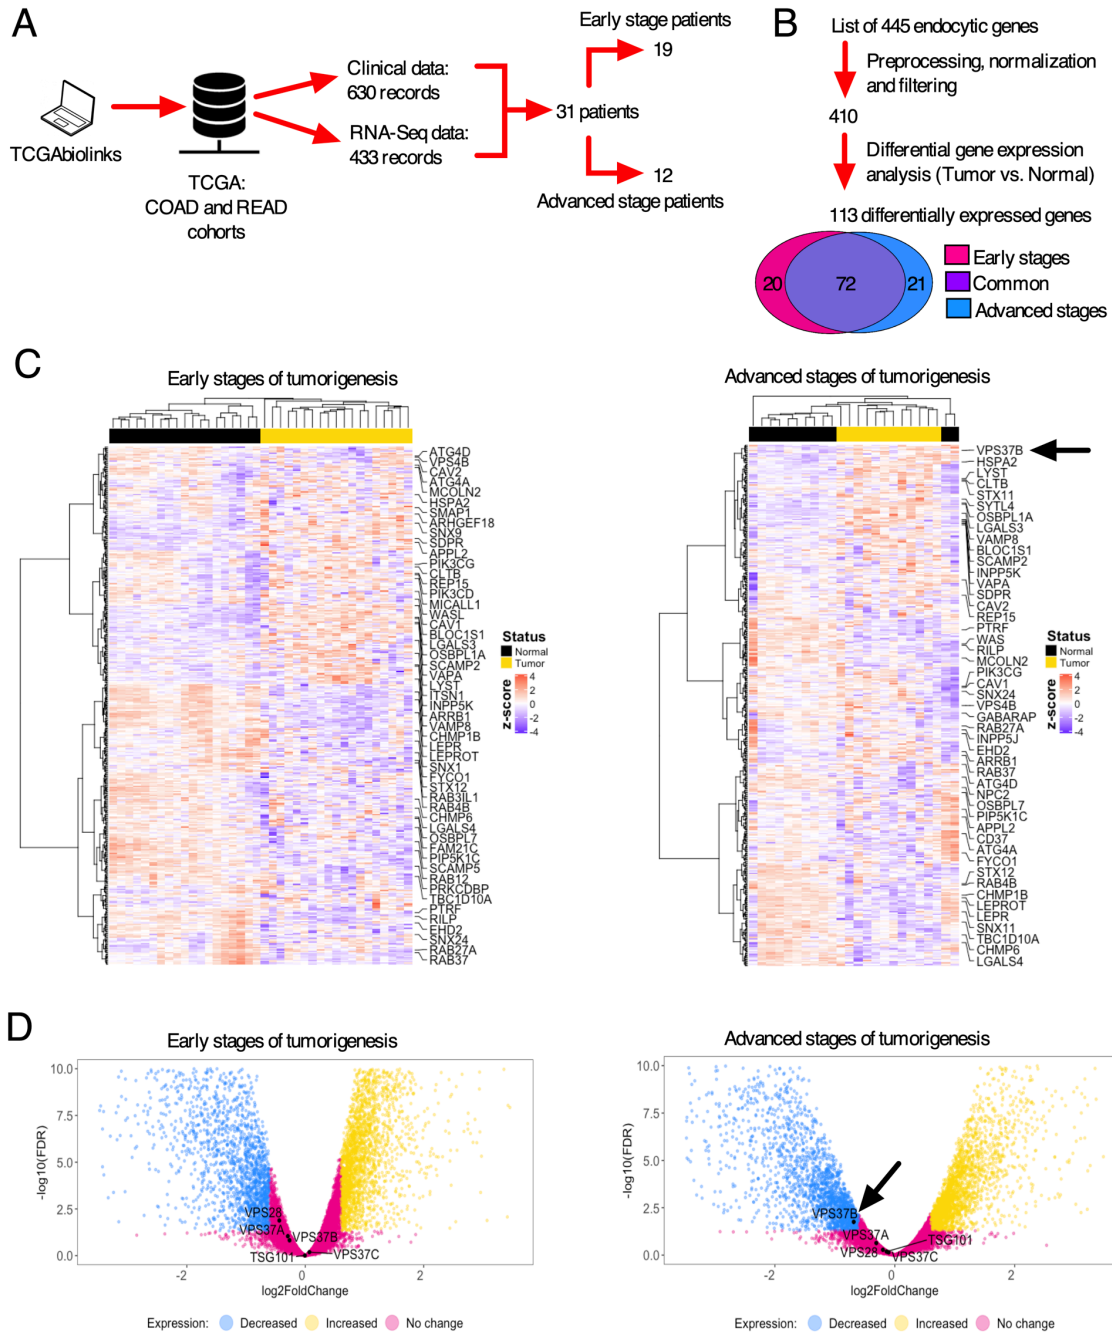

1078

1079 **Fig. 1. Expression of *VPS37B* is decreased in advanced stages of colorectal cancer. (A)**

1080 Scheme of data mining process of The Cancer Genome Atlas (TCGA) database with a focus on

1081 the COAD and READ cohorts using the TCGAbiolinks package. (B) Scheme showing the

1082 number of genes in consecutive stages of analysis and Venn diagram of differentially expressed

1083 genes related to endocytic transport in patients at the early (stage I and II) and advanced stages  
1084 (stage III and IV) of CRC. (C) Heatmaps visualizing the expression of the genes with decreased  
1085 expression in early stages and advanced stages of CRC. Columns are samples from normal tissue  
1086 or tumor. Rows are transcripts. (D) Volcano plots visualizing the expression of ESCRT genes in  
1087 early and advanced stages of CRC. Genes with increased and decreased expression are those  
1088 with False Discovery Rate (FDR)  $< 0.05$  and  $\log_2\text{FoldChange} \geq 0.6$  and  $\leq -0.6$ , respectively.

## Fig. 2

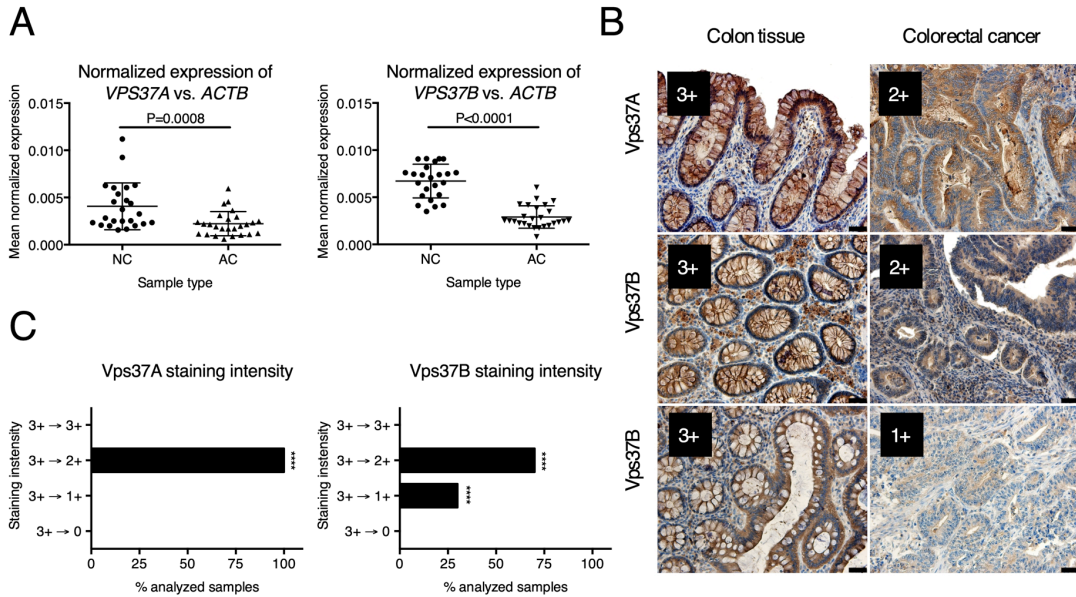

1089

1090 **Fig. 2. Abundance of *VPS37A* and *VPS37B* paralogs is decreased in a treatment-naïve**  
1091 **cohort of CRC patients.** (A) qRT-PCR analysis of *VPS37A* and *VPS37B* mRNA levels in  
1092 normal colon (NC, n=24) and adenocarcinoma (AC, n=26) samples. Middle lines are means and  
1093 whiskers are standard deviation. Differences were analyzed using the Mann-Whitney U test. (B)  
1094 Examples of IHC staining of Vps37A and Vps37B in normal colon and matched CRC samples  
1095 as an illustration of the scoring system used for the evaluation presented in (C). Scale bars: 200  
1096  $\mu$ m. (C) Comparative analysis of Vps37A and Vps37B IHC staining performed in pairs of  
1097 normal colon and matched CRC samples (n=100): 3+ – very intense staining, 2+ – medium  
1098 intense staining, 1+ – weak staining, 0 – no staining. Statistical significance was assessed against  
1099 healthy tissue using Fisher's exact test \*\*\*\* $P$ <0.0001.



**Fig. 3**

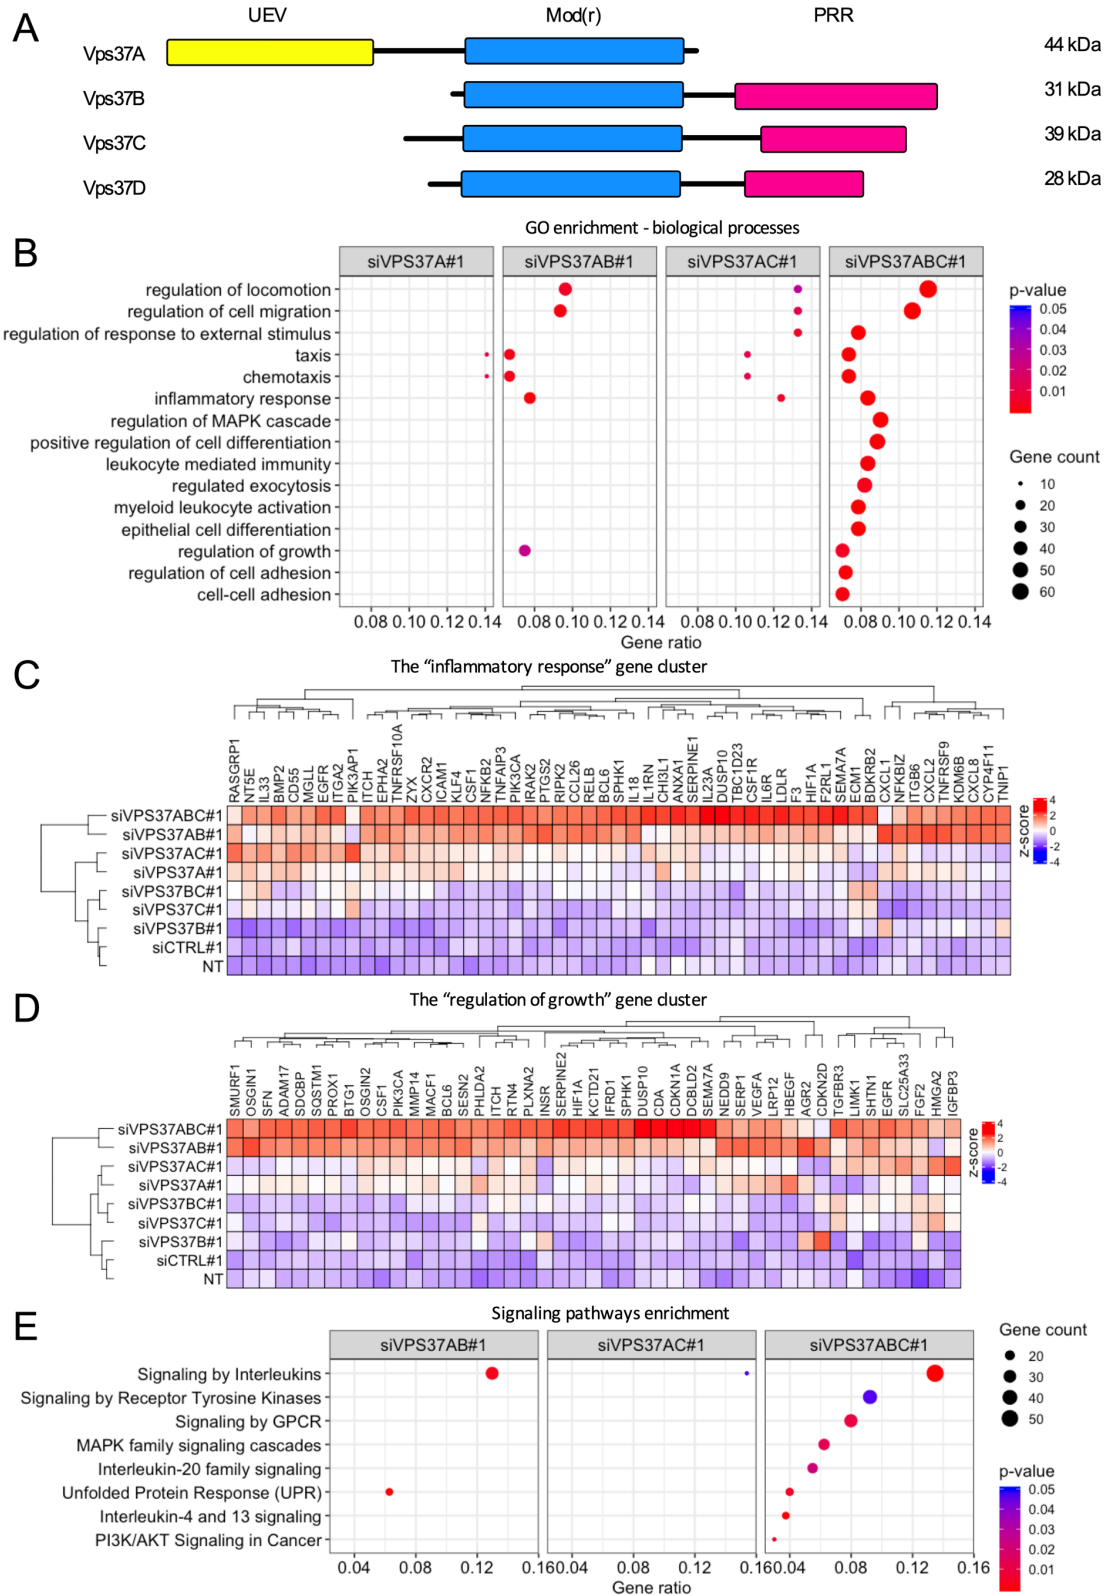

1101 **Fig. 3. Concurrent depletion of Vps37 proteins induces multiple transcriptional responses**  
1102 **in DLD1 cells.** (A) Domain architecture of human *VPS37* paralogs. UEV – ubiquitin enzyme  
1103 variant, Mod(r) – modifier of rudimentary, PRR – proline rich region. (B) Top 15 biological  
1104 processes from gene ontology (GO) analysis among differentially expressed genes ( $\geq 1.50$ -fold or  
1105  $\leq 0.667$ -fold; adjusted  $P < 0.05$ ) after individual or concurrent silencing of *VPS37* paralogs.  
1106 Analysis was performed using the enrichGO function from clusterProfiler. (C-D) Heatmaps  
1107 visualizing expression of genes related to inflammatory response (C) and regulation of cell  
1108 growth (D) generated from the GO analysis of biological processes across different transfection  
1109 conditions. (E) Selected pathways from the signaling pathway analysis among differentially  
1110 expressed genes after individual or concurrent silencing of *VPS37* paralogs. Analysis was  
1111 performed using the enrichPathway function from ReactomePA. RNA-Seq data analysis was  
1112 performed using n=3 independent experiments. NT – non-transfected cells, abbreviations for  
1113 differentially transfected cells are explained in Materials and Methods.

**Fig. 4**

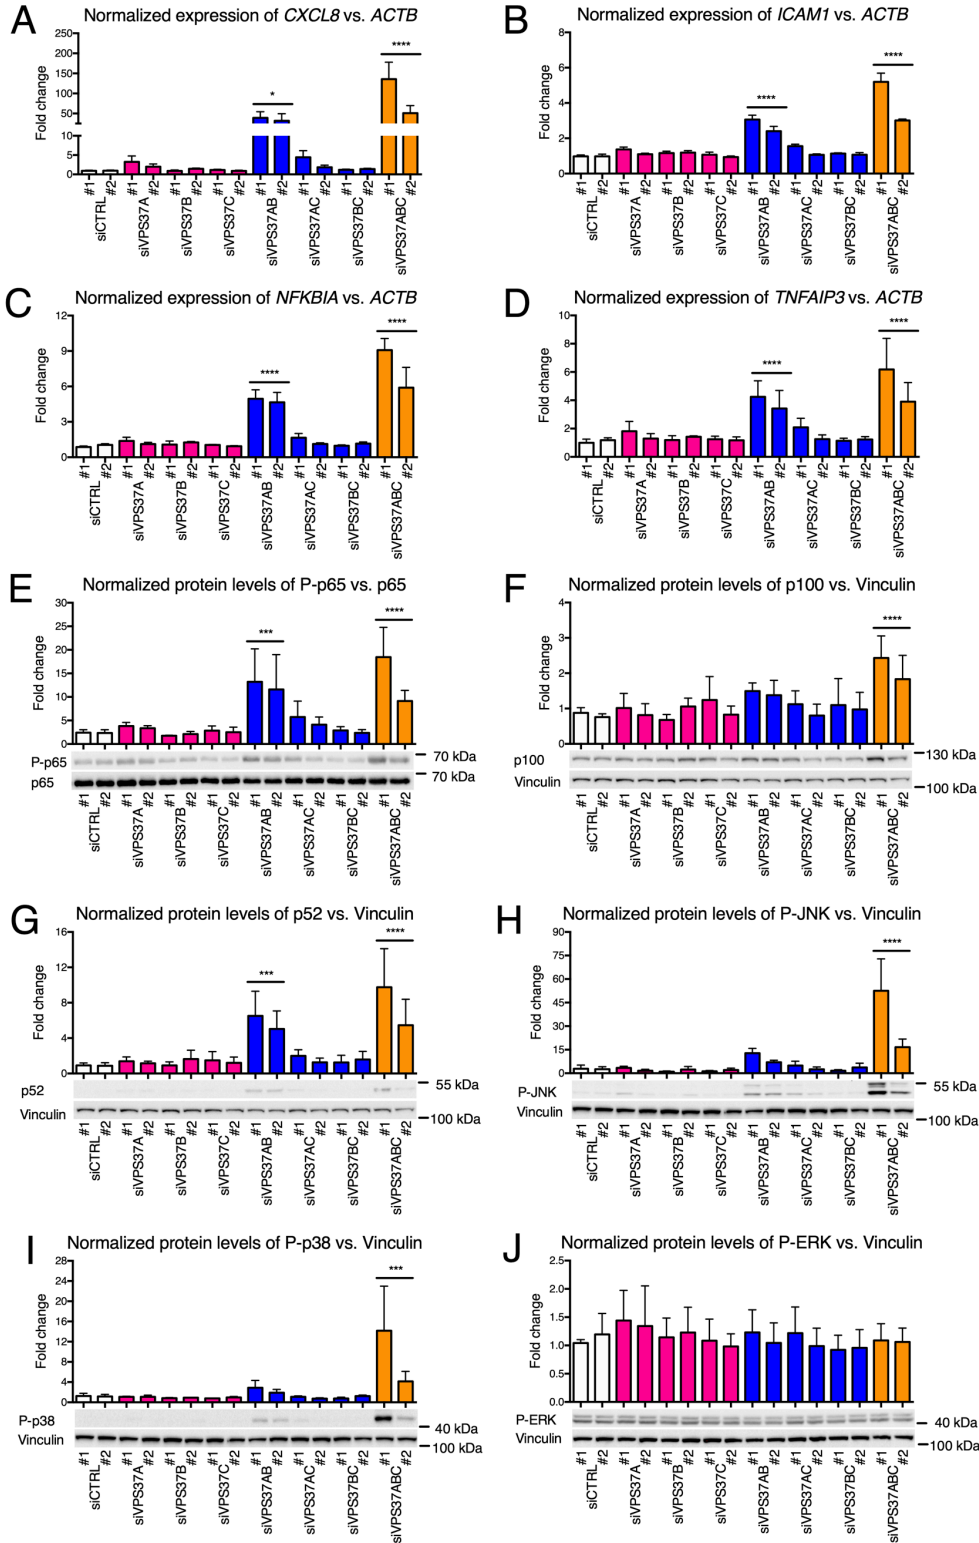

1114

1115 **Fig. 4. Concurrent depletion of Vps37 proteins induces MAPK and NF- $\kappa$ B inflammatory**  
1116 **responses in RKO cells.** (A-D) qRT-PCR analysis of expression of selected genes in the  
1117 inflammatory response cluster: (A) *CXCL8*, (B) *ICAM1*, (C) *NFKB1A* and (D) *TNFAIP3*,  
1118 measured 72 h after transfection with siRNA targeting *VPS37* paralogs individually or in  
1119 combinations. Non-transfected (NT) cells and transfected with non-targeting siRNA (siCTRL)  
1120 were used to assess the basal expression level of the investigated genes. *ACTB* (encoding  $\beta$ -  
1121 Actin) was used as a reference gene. (E-G) Western blotting analysis of the NF- $\kappa$ B pathway  
1122 activation: (E) phosphorylation of p65, (F) p100 and (G) p52 protein abundance. (H-J) Western  
1123 blotting analysis of MAPK activation: (H) phosphorylation of JNK, (I) phosphorylation of p38  
1124 and (J) phosphorylation of ERK. (E-J) Lysates of RKO cells were collected 72 h after  
1125 transfection with siRNA targeting *VPS37* paralogs individually or in combinations. Lysates from  
1126 non-transfected (NT) cells and transfected with non-targeting siRNA (siCTRL) were used to  
1127 assess the basal level of intracellular signaling. p65 and vinculin were used as loading controls.  
1128 Representative blots are shown along with densitometry analysis. Data in all panels are mean  $\pm$   
1129 standard deviation of n=3 independent experiments expressed as the fold change of either mRNA  
1130 (A-D) or protein (E-J) levels in NT cells, which was set as 1. Statistical significance was  
1131 assessed against grouped siCTRL conditions using one-way ANOVA test followed by  
1132 Bonferroni's correction; \* $P$ <0.05, \*\* $P$ <0.01, \*\*\* $P$ <0.001, \*\*\*\* $P$ <0.0001.

**Fig. 5**

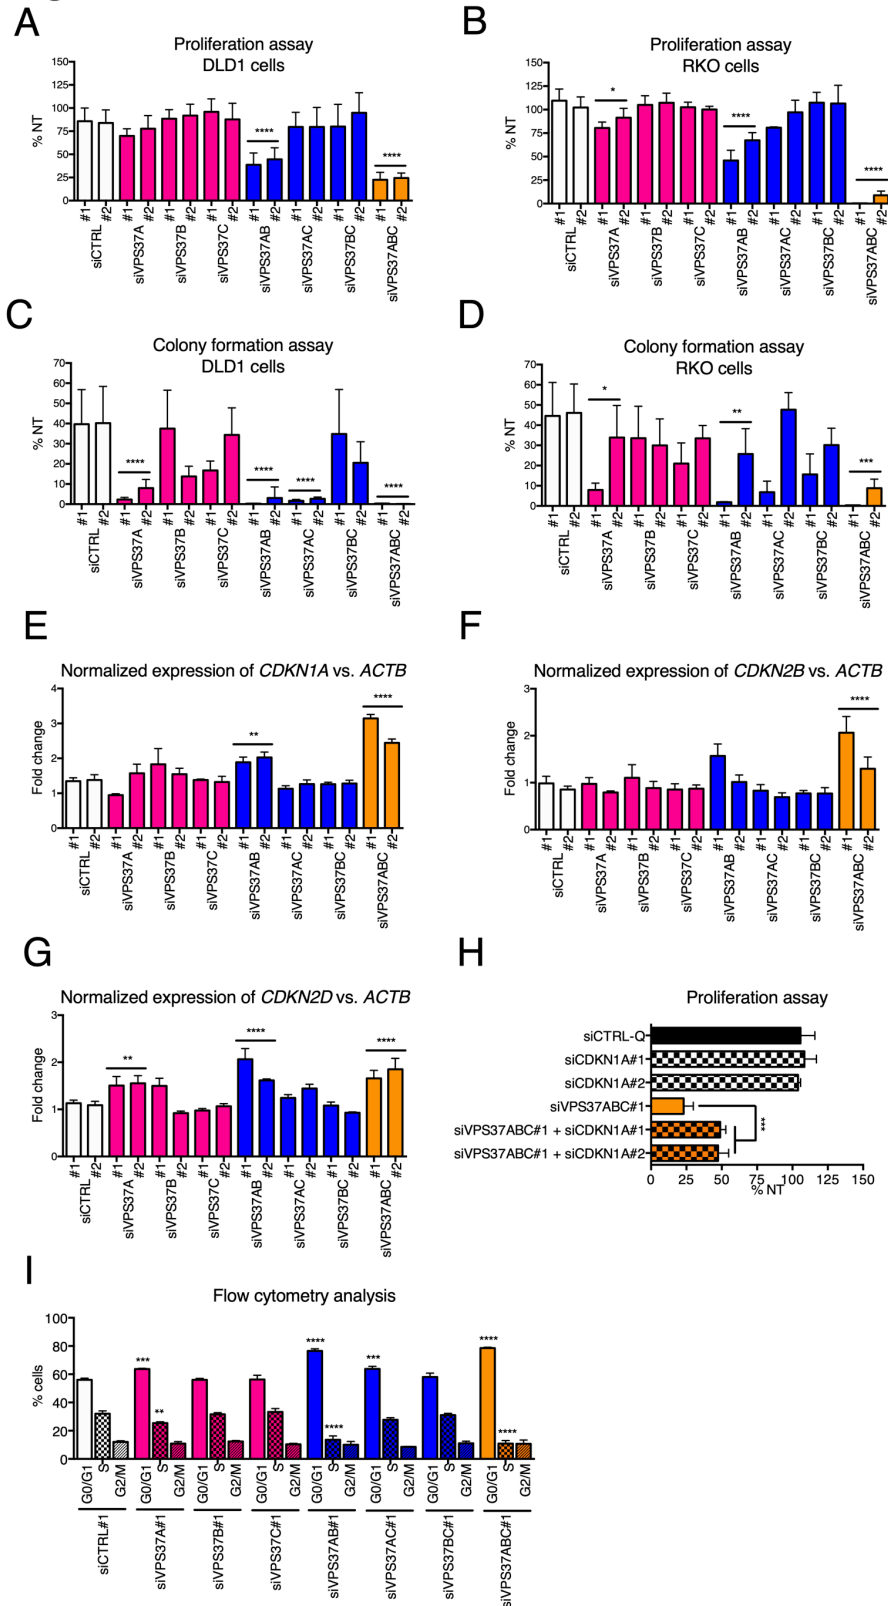

1134 **Fig. 5. Concurrent depletion of Vps37 proteins inhibits CRC cell growth *in vitro*.** (A, B) Cell  
1135 proliferation of (A) DLD1 and (B) RKO cells assessed 120 h after individual and concurrent  
1136 depletion of *VPS37* paralogs using the BrdU proliferation assay. (C, D) Clonogenic growth of  
1137 (C) DLD1 and (D) RKO cells assessed 14 days after individual and concurrent knockdown of  
1138 *VPS37* paralogs with representative images for each transfection condition shown in Fig. S4A for  
1139 DLD1 cells and Fig. S4B for RKO cells. (E-G) qRT-PCR analysis of expression of genes  
1140 encoding *CDKNs*: (E) *CDKN1A*, (F) *CDKN2B* and (G) *CDKN2D*, measured 72 h after individual  
1141 and concurrent depletion of Vps37 paralogs. Non-transfected (NT) cells and transfected with  
1142 non-targeting siRNA were used to assess the basal level of the investigated genes. *ACTB*  
1143 (encoding  $\beta$ -Actin) was used as a reference gene. (H) Cell proliferation of RKO cells was  
1144 assessed 120 h after concurrent silencing of all *VPS37* paralogs and *CDKN1A* using the  
1145 proliferation assay. (I) Analysis of cell cycle was performed upon individual or concurrent  
1146 silencing of *VPS37* paralogs. Cells were forward transfected for 96 h, stained with PI and  
1147 evaluated with a flow cytometer. Data presented in all panels are mean of n=3 independent  
1148 experiments  $\pm$  standard deviation analyzed with one-way ANOVA with Bonferroni's correction.  
1149 Statistical significance for grouped siCTRL conditions (A-G, I) and for siCTRL#1-Q (I);  
1150 \* $P$ <0.05; \*\* $P$ < 0.01, \*\*\* $P$ < 0.001, \*\*\*\* $P$ < 0.0001.

## Fig. 6

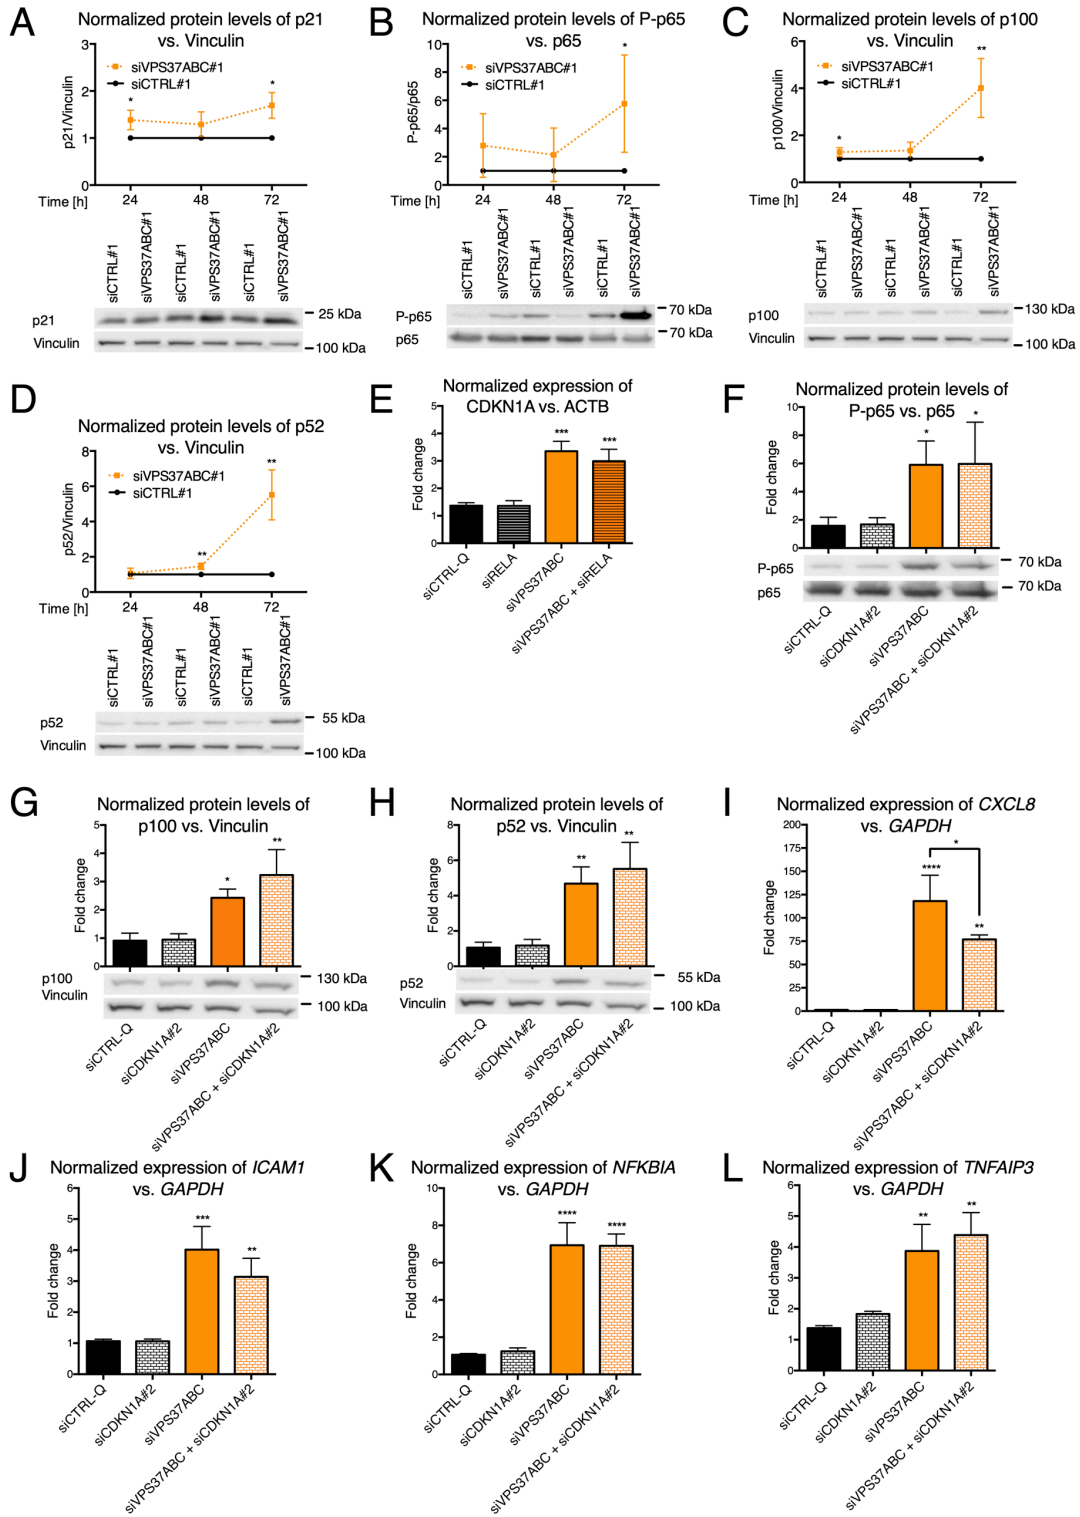



1152 **Fig. 6. Inflammatory response and cell growth inhibition after concurrent depletion of**  
1153 ***VPS37* paralogs are two independently regulated processes in RKO cells.** (A-D) Western  
1154 blot analyses of (A) p21, (B) phosphorylated p65, (C) p100 and (D) p52 abundance were  
1155 performed 24, 48 and 72 h after transfection with non-targeting or on-target siRNA for  
1156 *VPS37ABC*. (E) qRT-PCR analysis of *CDKN1A* was performed 72 h after transfection with  
1157 siRNA targeting the p65 subunit of NF- $\kappa$ B dimer (*RELA*) alone or in combination with three  
1158 *VPS37* paralogs. (F-H) Western blotting analyses of (F) phosphorylated p65, (G) p100 and (H)  
1159 p52 abundance were performed 72 h after transfection with siRNA targeting *CDKN1A* alone or  
1160 in combination with all the three *VPS37* paralogs. (I-L) qRT-PCR analyses of (I) *CXCL8*, (J)  
1161 *ICAMI*, (K) *NFKB1A*, and (L) *TNFAIP3* were performed 72 h after transfection with siRNA  
1162 targeting *CDKN1A* alone or in combination with all the three *VPS37* paralogs. (E, I-L) *ACTB*  
1163 (encoding  $\beta$ -Actin) or *GAPDH* (encoding Glyceraldehyde 3-phosphate dehydrogenase) were  
1164 used as a reference gene in qRT-PCR analysis. (A-D, F-H) p65 and vinculin were used as  
1165 loading controls for Western blotting. Representative blots are shown along with densitometry  
1166 analysis. Data in all panels are mean  $\pm$  standard deviation of n=3 independent experiments  
1167 expressed as the fold change of either mRNA or protein level. In panels A-D protein abundance  
1168 in siCTRL#1 transfected cells was set to 1, whilst in panels E-L mRNA and protein abundance in  
1169 non-transfected (NT) cells was set as 1. Statistical significance was assessed using unpaired  
1170 Student's t-test (A-D) or one-way ANOVA test followed by Bonferroni's correction (E-L).  
1171 Statistical significance against siCTRL#1 at matching time point for transfection with three  
1172 different siRNA (A-D) and siCTRL-Q for four different siRNA (E-L), \* $P$ <0.05, \*\* $P$ <0.01,  
1173 \*\*\* $P$ <0.001, \*\*\*\* $P$ <0.0001.

## Fig. 7

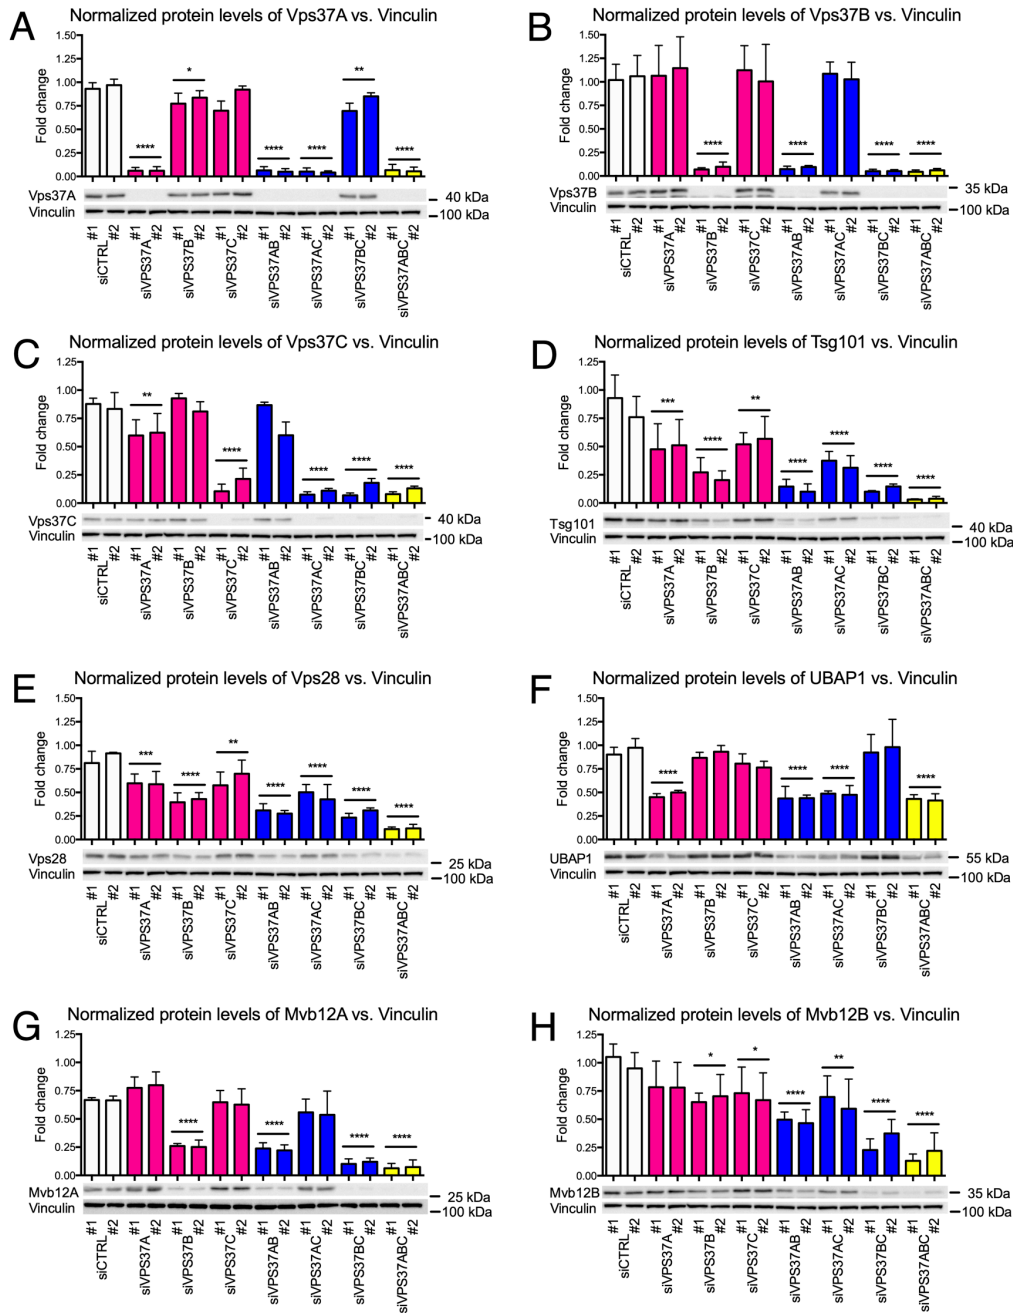

1174

1175 **Fig. 7. Concurrent depletion of Vps37 proteins destabilizes ESCRT-I components and**  
 1176 **reveals partnering preferences for auxiliary subunits.** Western blotting analysis of ESCRT-I  
 1177 subunits: (A) Vps37A, (B) Vps37B, (C) Vps37C, (D) Tsg101, (E) Vps28, (F) UBAP-1, (G)  
 1178 Mvb12A and (H) Mvb12B. Lysates of RKO cells were collected 72 h after transfection with  
 1179 siRNA targeting *VPS37* paralogs individually or in combinations. Lysates of RKO cells from

1180 non-transfected (NT) cells and transfected with non-targeting siRNA were used to assess the  
1181 basal level of ESCRT-I subunits. Vinculin was used as a loading control. Representative blots  
1182 are shown along with densitometry analysis. Data are mean  $\pm$  standard deviation of n=3  
1183 independent experiments expressed as the fold change of protein level in NT cells, which was set  
1184 as 1. Statistical significance was assessed using ANOVA test followed by Bonferroni's  
1185 correction. Statistical significance against siCTRL conditions, \* $P$ <0.05, \*\* $P$ <0.01, \*\*\* $P$ <0.001,  
1186 \*\*\*\* $P$ <0.0001.

1187 **Table 1. Transcription factors driving expression of genes belonging to the inflammatory**  
 1188 **response cluster.** Transcriptional motif-enrichment analysis of the inflammatory response gene  
 1189 cluster identified in our RNA-Seq analysis was performed using RcisTarget. A region of 500 bp  
 1190 upstream and 100 bp downstream to the transcription starting site was investigated with the  
 1191 TFBS matrices from the JASPAR database.

| Transcription Factor | Consensus sequence                                                                  | Normalized Enrichment Score | Genes from the inflammatory response cluster                                                               |
|----------------------|-------------------------------------------------------------------------------------|-----------------------------|------------------------------------------------------------------------------------------------------------|
| RELA (p65)           | 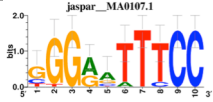   | 7.72                        | BCL6, CSF1, CXCL1, CXCL2, CXCL8, F3, NKFB2, NFKBIZ, PTGS2, RELB, RIPK2, TNFAIP3, TNIP, ZYS                 |
| REL (p65/RelB/c-Rel) |    | 6.21                        | BCL6, CSF1, CXCL1, CXCL2, CXCL8, IL18, IL1RN, LDLR, NFKB2, NFKBIZ, RELB, RIPK2, SEMA7A, TNFAIP3, TNIP, ZYS |
| FOSL1 (Fra-1)        |   | 3.38                        | BCL6, CXCL8, ECM1, F3, IL1RN, IL23A, SPHK1, TNFAIP3                                                        |
| JUNB (Jun-B)         |  | 3.29                        | BCL6, CXCL8, ECM1, F2, IL1RN, IL23A, SNHK1, TNFAIP3                                                        |
| JUN (c-Jun)          |  | 3.25                        | BCL6, CXCL8, ECM1, F3, IL1RN, IL23A, SPHK1, TNFAIP3                                                        |
| FOSL2 (Fra-2)        |  | 3.17                        | BCL6, CXCL8, ECM1, F3, IL1RN, IL23A, SPHK1, TNFAIP3                                                        |
| JUND (Jun-D)         |  | 3.02                        | BCL6, CXCL8, ECM1, F3, IL1RN, IL23A, SPHK1, TNFAIP3                                                        |

1192

**Fig. S1**

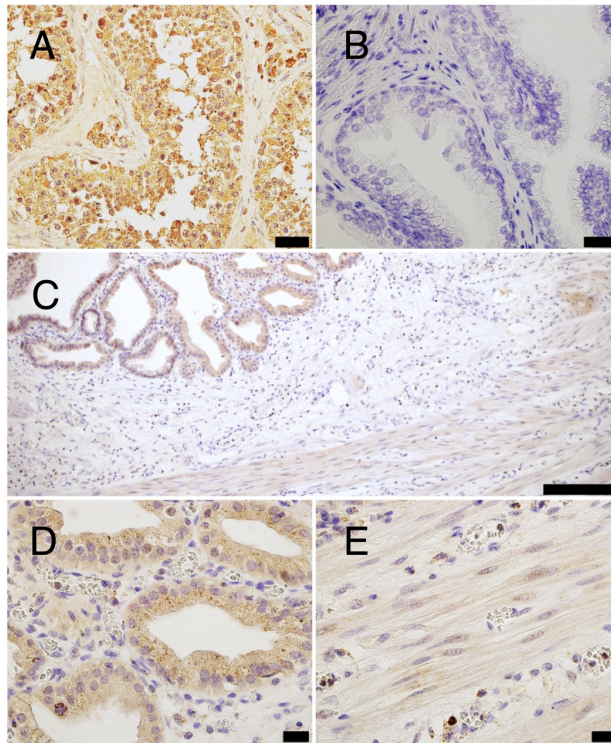

1193

1194 **Fig. S1. Immunohistochemical evaluation of the specificity of antibodies against Vps37A**  
1195 **and Vps37B proteins. Vps37A:** (A) positive control - strong granular cytoplasmic staining in  
1196 the glandular epithelium of testis (scale bar 20  $\mu\text{m}$ ), (B) lack of staining in the glandular  
1197 epithelium of prostate (scale bar 10  $\mu\text{m}$ ). **Vps37B:** (C) positive control - strong granular  
1198 cytoplasmic staining in the mucosa of the gallbladder (scale bar 100  $\mu\text{m}$ ) and (D) at higher  
1199 magnification (scale bar 10  $\mu\text{m}$ ), (E) weak staining in the muscle (scale bar 10  $\mu\text{m}$ ).

**Fig. S2**

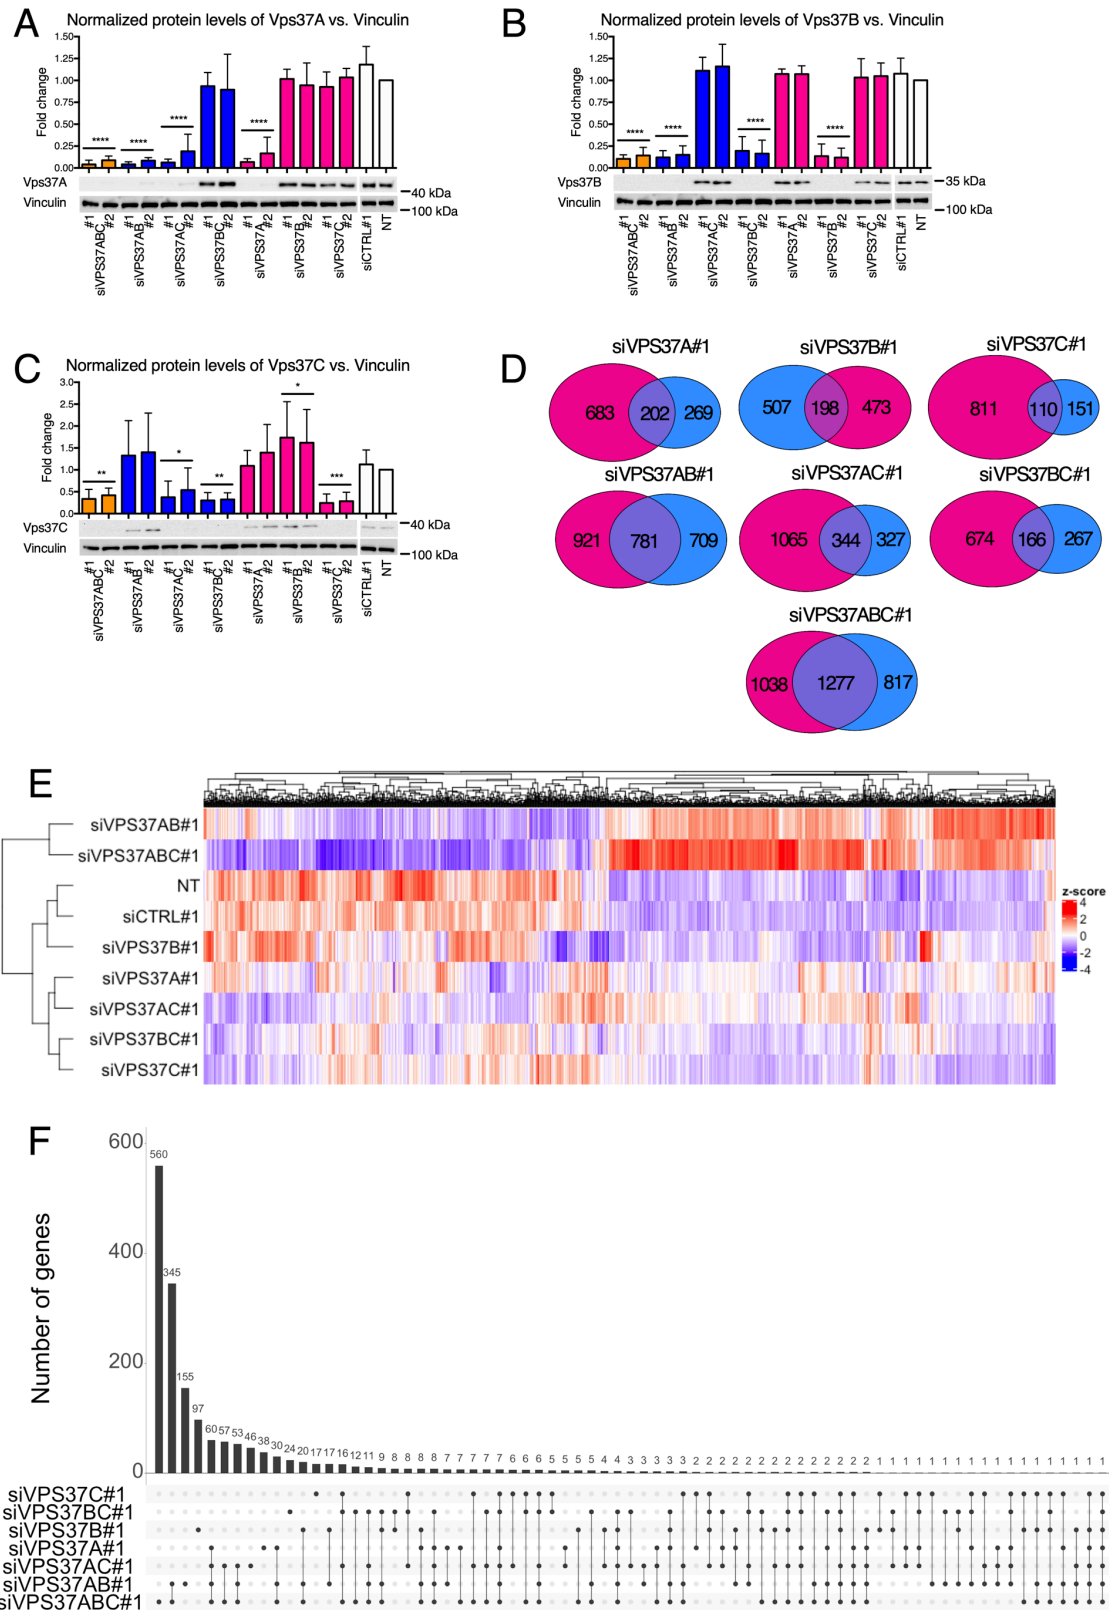

1201 **Fig. S2. Transcriptional alteration after individual or combined knockdown of *VPS37***  
1202 **paralogs in DLD1 cells.** (A-C) Western blotting analysis of selectivity of siRNAs for the *VPS37*  
1203 paralogs: (A) *VPS37A*, (B) *VPS37B* and (C) *VPS37C*. Lysates were collected 72 h after  
1204 transfection with siRNA targeting individual or combinations of *VPS37* paralogs. Lysates from  
1205 non-transfected (NT) cells and transfected with non-targeting siRNA (siCTRL#1) were used to  
1206 assess the basal level of intracellular signaling. Vinculin was used as a loading control.  
1207 Representative blots from n=5 independent experiments are shown along with densitometry  
1208 analysis. Data are mean  $\pm$  standard deviation expressed as the fold change of protein level in NT  
1209 cells, which was set as 1. Statistical significance was assessed against grouped NT and  
1210 siCTRL#1 conditions using one-way ANOVA test followed by Bonferroni's correction;  
1211 \* $P < 0.05$ , \*\* $P < 0.01$ , \*\*\* $P < 0.001$ , \*\*\*\* $P < 0.0001$ . (D) Venn diagrams of differentially expressed  
1212 genes ( $\geq 1.50$ -fold or  $\leq 0.667$ -fold; adjusted  $P < 0.05$ ) after single, double or triple *VPS37* paralog  
1213 silencing when normalized to non-transfected (NT, pink circles) cells and cells transfected with  
1214 non-targeting siRNA (siCTRL#1, blue circles). Differentially expressed genes were identified  
1215 using DESeq2. (E) Heatmap visualizing clustering of expression patterns for differentially  
1216 expressed genes in DLD1 cells across different transfection conditions. (F) Clustered heatmap  
1217 showing pairwise intersections for the common pools of differentially expressed genes ( $\geq 1.50$ -  
1218 fold or  $\leq 0.667$ -fold; adjusted  $P < 0.05$ ) after single, double or triple *VPS37* paralog silencing  
1219 when normalized to non-transfected cells and cells transfected with non-targeting siRNA for the  
1220 investigated transfection conditions. RNA-Seq data analysis was performed using n=3  
1221 independent experiments.



## Fig. S3

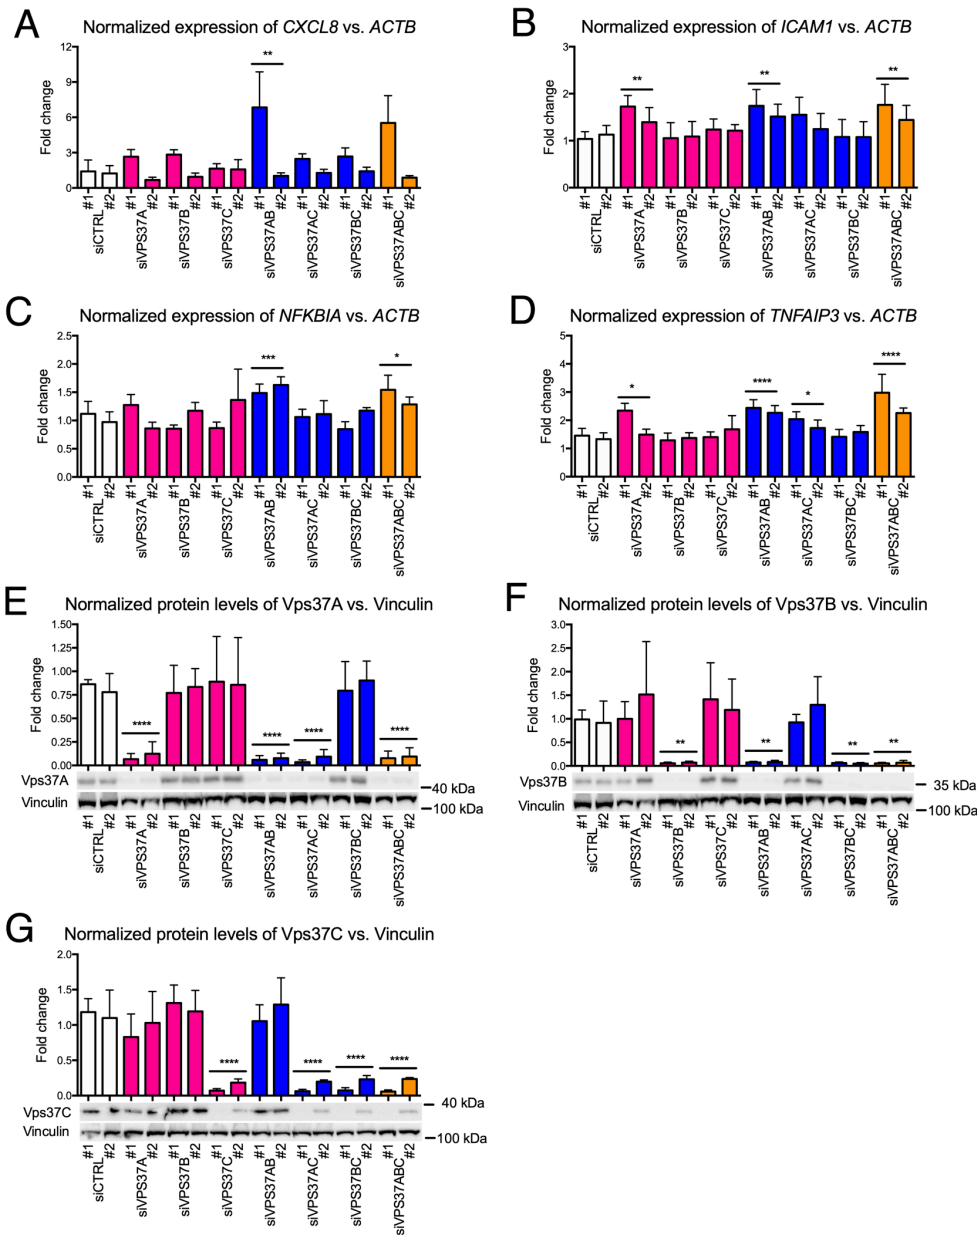

1222

1223 Fig. S3. Induction of inflammatory gene expression upon concurrent silencing of *VPS37*  
 1224 **paralogs**. (A-D) qRT-PCR analysis of selected genes in the inflammatory response cluster: (A)  
 1225 *CXCL8*, (B) *ICAM1*, (C) *NFKBIA* and (D) *TNFAIP3* in DLD1 cells. Expression of genes was  
 1226 measured 72 h after forward transfection with siRNA targeting of *VPS37* paralogs individually  
 1227 or in combinations. Non-transfected (NT) cells and transfected with non-targeting siRNA  
 1228 (siCTRL) were used to assess the basal expression level of the investigated genes. *ACTB*

1229 (encoding  $\beta$ -Actin) was used as a reference gene. Data in panels (A-D) are mean  $\pm$  standard  
1230 deviation of n=5 independent experiments. Data are expressed as the fold change of mRNA  
1231 levels in NT cells, which was set as 1. (E-G) Western blotting analysis of selectivity of siRNAs  
1232 for the *VPS37* paralogs. Lysates were collected 72 h after forward transfection with siRNA  
1233 targeting individual or combinations of *VPS37* paralogs. Lysates from NT cells and transfected  
1234 with non-targeting siRNA (siCTRL#1 and siCTRL#2) were used to assess the basal level of  
1235 intracellular signaling. Vinculin was used as a loading control. Representative blots from n=3  
1236 independent experiments are shown along with densitometry analysis. Data are mean  $\pm$  standard  
1237 deviation expressed as the fold change of protein level in NT cells, which was set as 1. Statistical  
1238 significance in all panels was assessed against grouped siCTRL conditions using one-way  
1239 ANOVA test followed by Bonferroni's correction; \* $P$ <0.05, \*\* $P$ <0.01, \*\*\* $P$ <0.001,  
1240 \*\*\*\* $P$ <0.0001.

**Fig. S4**

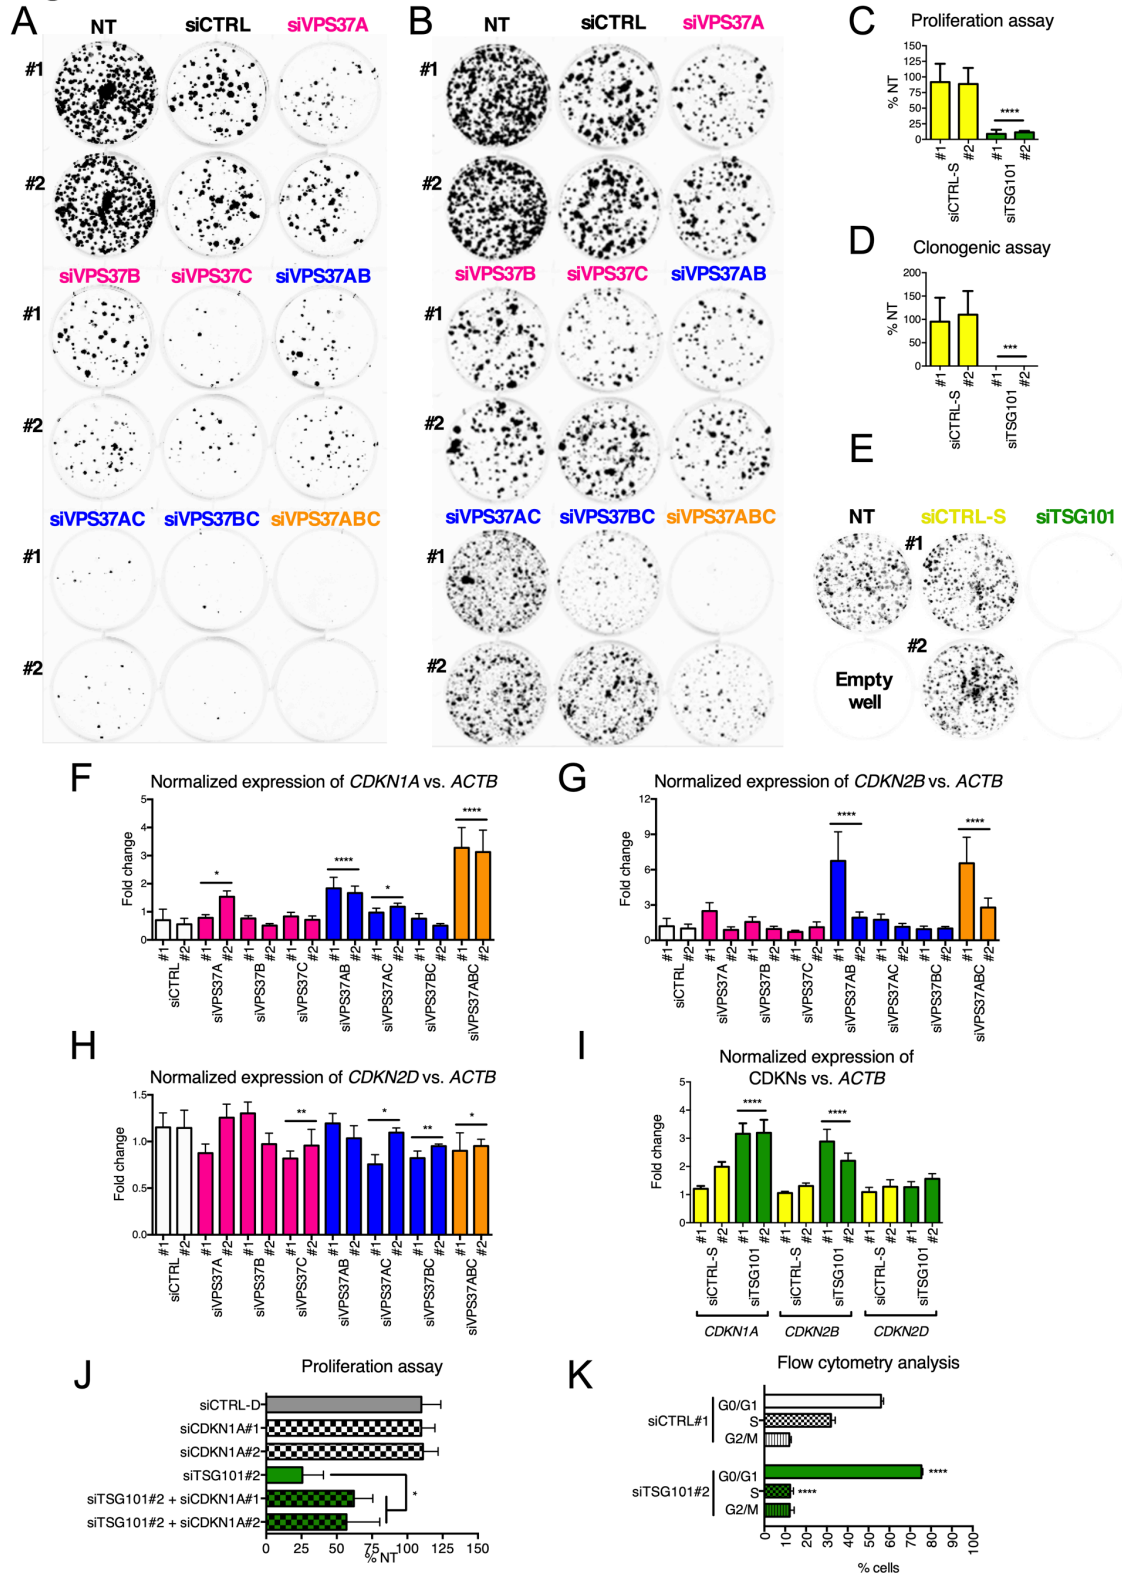

1242 Fig. S4. **CRC cell growth inhibition upon knockdown of all *VPS37* paralogs or *TSG101*.** (A,  
1243 B) Representative images of clone formation assessed 14 days after differential knockdown of  
1244 *VPS37* paralogs in (A) DLD1 and (B) RKO cells. (C) Cell proliferation of RKO cells assessed  
1245 120 h after *TSG101* knockdown using the BrdU proliferation assay. (D) Clonogenic growth of  
1246 RKO cells assessed 14 days after *TSG101* knockdown. (E) Representative images of clone  
1247 formation assessed 14 days after knockdown of *TSG101* in RKO cells. (F-H) qRT-PCR analysis  
1248 of expression of genes encoding CDKNs: (F) *CDKN1A*, (G) *CDKN2B* and (H) *CDKN2D* in  
1249 DLD1 cells. Expression of *CDKNs* was measured 72 h after individual and concurrent depletion  
1250 of Vps37 proteins in n=5 independent experiments. (I) qRT-PCR analysis of expression of genes  
1251 encoding CDKNs: *CDKN1A*, *CDKN2B* and *CDKN2D* in RKO cells. Expression of *CDKNs* was  
1252 measured 72 h after Tsg101 depletion. Non-transfected (NT) cells and transfected with non-  
1253 targeting siRNA (siCTRL) were used to assess the basal level of the investigated genes. *ACTB*  
1254 (encoding  $\beta$ -Actin) was used as a reference gene. (J) Cell proliferation of RKO cells was  
1255 assessed 120 h after concurrent silencing of *TSG101* and *CDKN1A* using the proliferation assay.  
1256 (K) Analysis of cell cycle was performed upon Tsg101 depletion. Cells were forward transfected  
1257 for 96 h, stained with PI and evaluated with a flow cytometer. Unless stated otherwise data  
1258 presented in all panels are mean of n=3 independent experiments  $\pm$  standard deviation analyzed  
1259 with one-way ANOVA with Bonferroni's correction (F-H, J) or Student's t-test (C, D, I, K).  
1260 Statistical significance for grouped siCTRL conditions (A-J) and for siCTRL#1 in panel K, \*  
1261  $P<0.05$ ; \*\*  $P<0.01$ , \*\*\*  $P<0.001$ , \*\*\*\*  $P<0.0001$ .

1262

**Fig. S5**

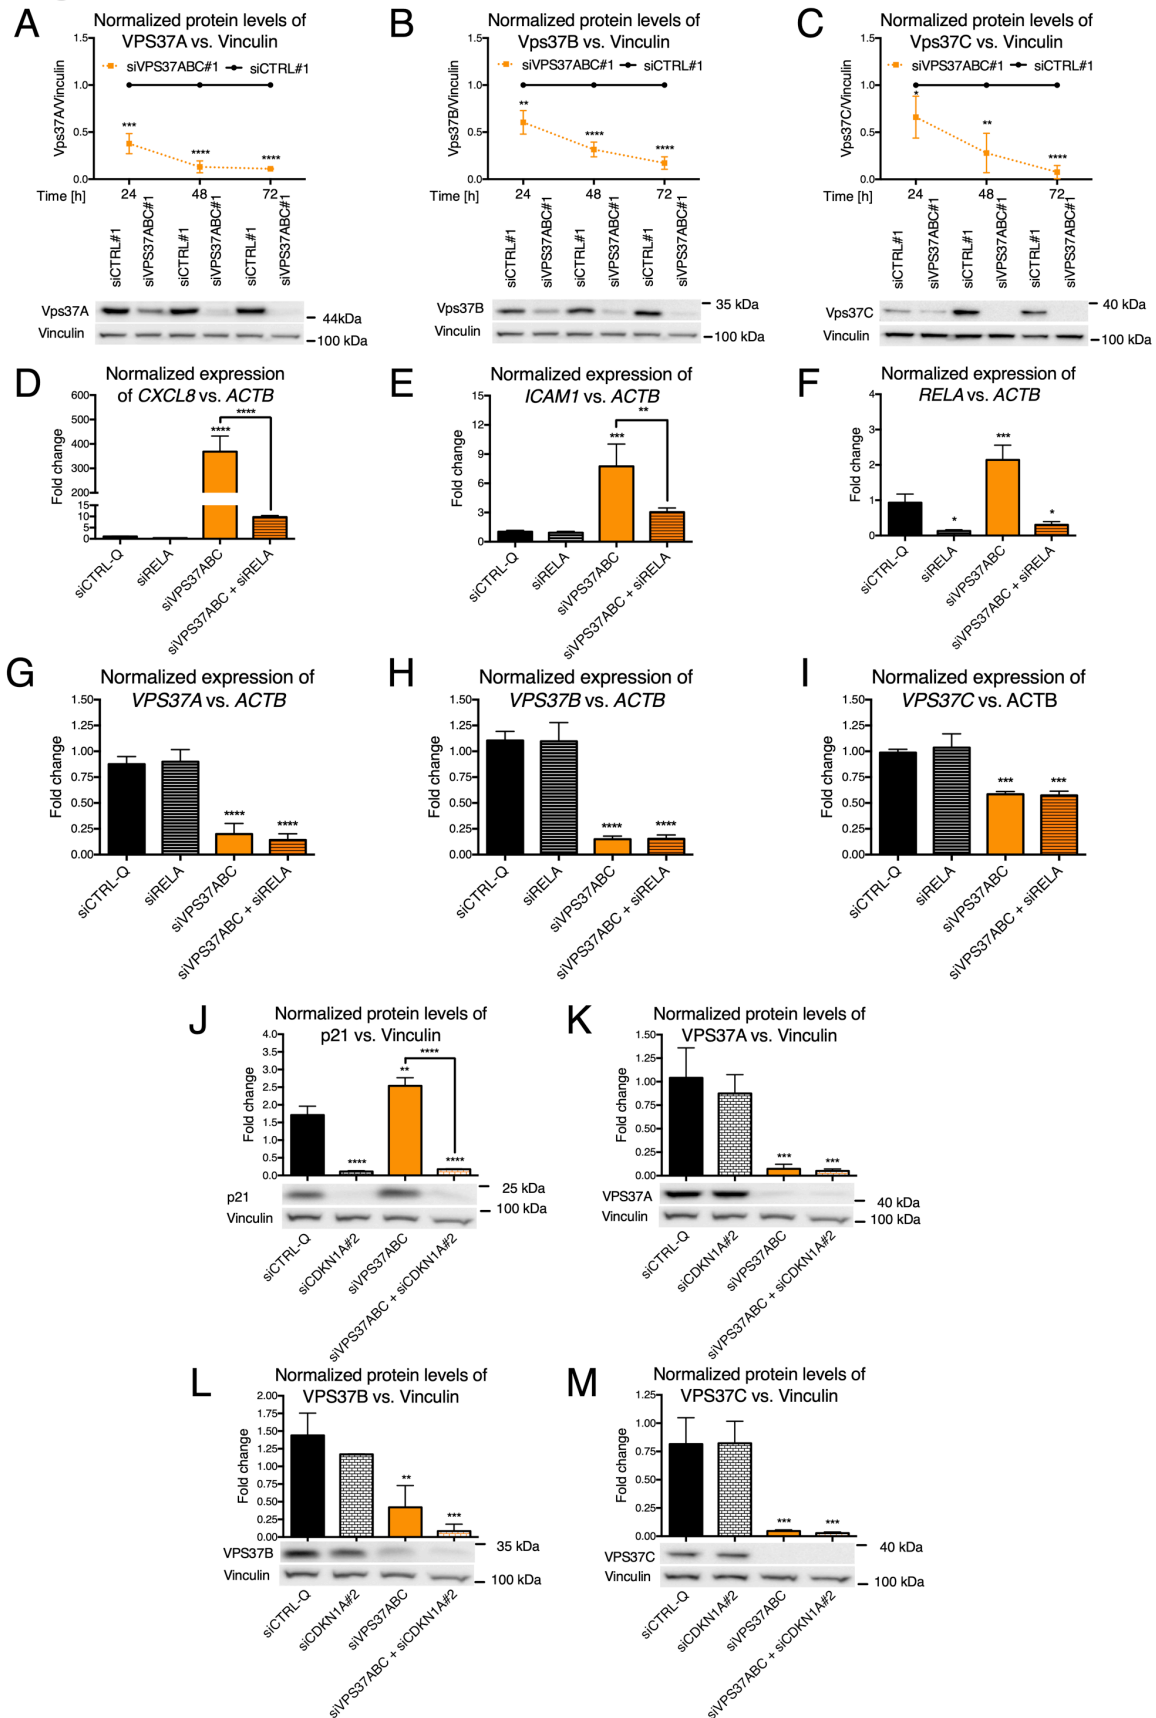

1264 **Fig. S5. Control experiments corroborating independent activation of NF- $\kappa$ B inflammatory**  
1265 **response and p21-mediated inhibition of cell growth.** (A-C) Western blot analyses of (A)  
1266 Vps37A, (B) Vps37B, and (C) Vps37C levels were performed 24, 48 and 72 h after transfection  
1267 with non-targeting or on-target siRNA for *VPS37ABC*. (D-K) qRT-PCR analyses of (D) *CXCL8*,  
1268 (E) *ICAMI*, (F) *RELA*, (G) *VPS37A*, (H) *VPS37B*, and (I) *VPS37C* and (I) were performed 72 h  
1269 after transfection with siRNA targeting the p65 component of NF- $\kappa$ B heterodimers alone or in  
1270 combination with the three *VPS37* paralogs. (J-M) Western blotting analyses of (J) p21, (K)  
1271 Vps37A, (L) Vps37B and (M) Vps37C abundance were performed 72 h after transfection with  
1272 siRNA targeting *CDKN1A* alone or in combination with the three *VPS37* paralogs. (D-K) *ACTB*  
1273 (encoding  $\beta$ -Actin) was used as a reference gene in qRT-PCR analysis. (A-C, J-M) Vinculin was  
1274 used as a loading control for Western blotting. Representative blots are shown along with  
1275 densitometry analysis. Data in all panels are mean  $\pm$  standard deviation of n=3 independent  
1276 experiments expressed as the fold change of either mRNA or protein abundance. In panels A-C  
1277 protein abundance in siCTRL#1 transfected cells was set to 1, whilst in panels D-I mRNA and  
1278 protein abundance in non-transfected (NT) cells was set as 1. Statistical significance was  
1279 assessed using unpaired Student's t-test (A-C) or one-way ANOVA test followed by  
1280 Bonferroni's correction (D-M). Statistical significance against siCTRL#1 at matching time point  
1281 for transfection with three different siRNA (A-C) and siCTRL-Q for four different siRNA (D-  
1282 M), \* $P$ <0.05, \*\* $P$ <0.01, \*\*\* $P$ <0.001, \*\*\*\* $P$ <0.0001.

## Fig. S6

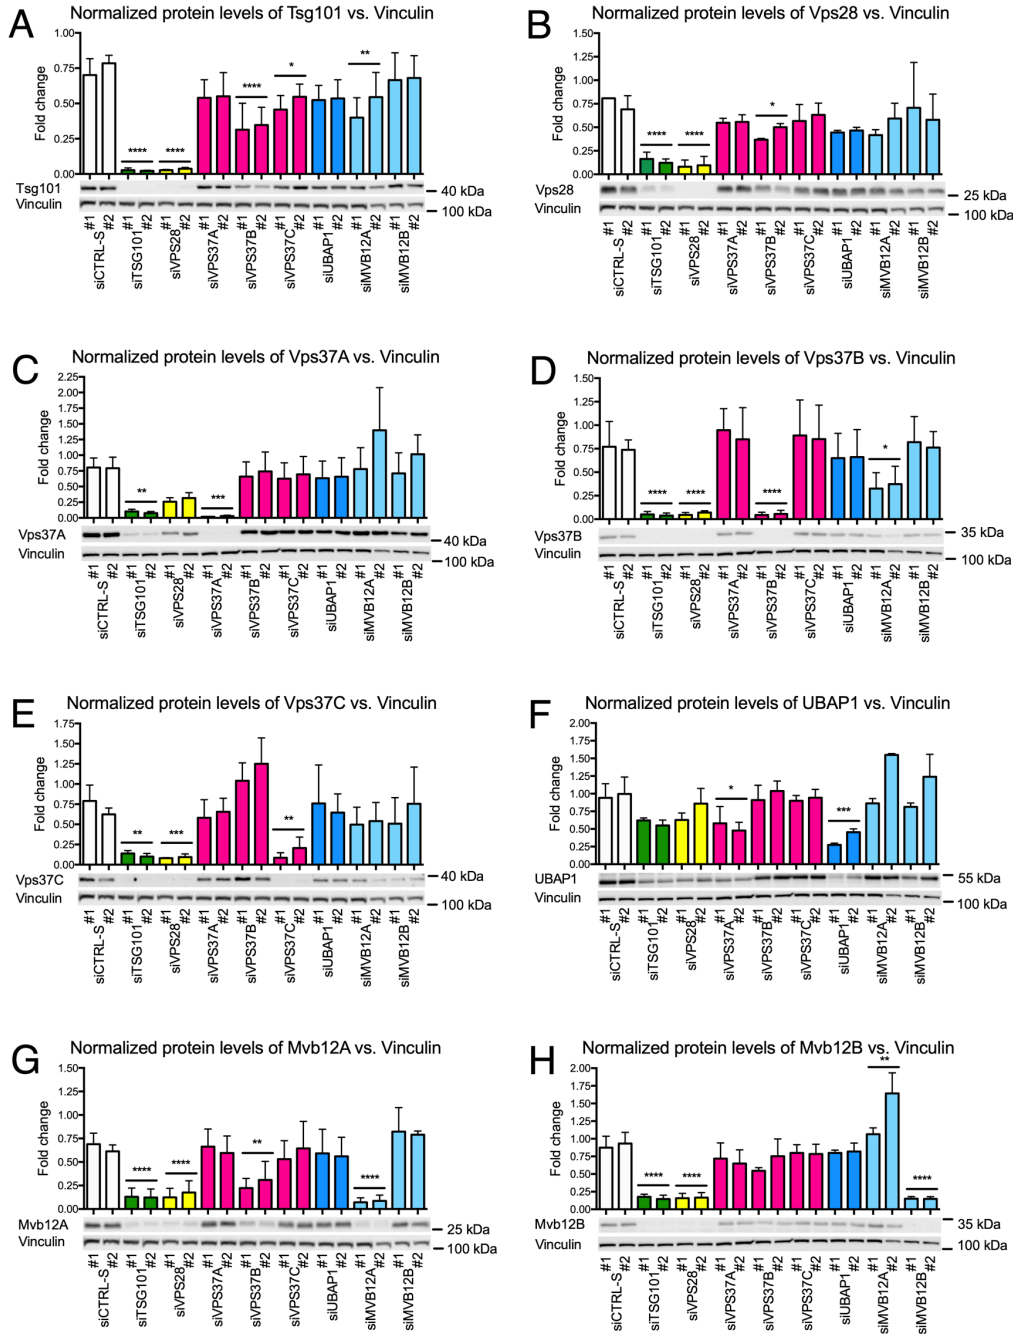

1283

1284 Fig. S6. Destabilization of ESCRT-I subunits upon depletion of Tsg101 and Vps28. Western  
 1285 blotting analysis of ESCRT-I subunits: (A) Vps37A, (B) Vps37B, (C) Vps37C, (D) Tsg101, (E)  
 1286 Vps28, (F) UBAP-1, (G) Mvb12A and (H) Mvb12B. Lysates of RKO cells were collected 72 h  
 1287 after transfection with siRNA targeting individual ESCRT-I components. Lysates from non-



1288 transfected cells and transfected with non-targeting siRNA were used to assess the basal level of  
1289 ESCRT-I subunits. Vinculin was used as a loading control. Representative blots are shown along  
1290 with densitometry analysis. Data are mean  $\pm$  standard deviation of n=3 independent experiments  
1291 expressed as the fold change of protein level in non-transfected cells, which was set as 1.  
1292 Statistical significance was assessed using ANOVA test followed by Bonferroni's correction.  
1293 Statistical significance against siCTRL-S conditions, \* $P$ <0.05, \*\* $P$ <0.01, \*\*\* $P$ <0.001,  
1294 \*\*\*\* $P$ <0.0001.

1295 **Table S1. List of genes used for TCGA data mining.**

1296 *AAK1 ACAP2 ACTR2 ACTR3 AFTPH AKAP10 AMBRA1 AMPH ANKFY1 ANXA2 AP1B1*  
1297 *AP1G2 AP1M1 AP1M2 AP1S1 AP2A1 AP2A2 AP2B1 AP2M1 AP2S1 AP3B1 AP3D1 AP3M1*  
1298 *AP3M2 AP3S1 AP4B1 AP4E1 AP4M1 AP4S1 AP5B1 AP5M1 AP5S1 AP5Z1 APPL1 APPL2*  
1299 *ARF1 ARF5 ARF6 ARFGAP1 ARFGAP3 ARFGEF1 ARFGEF2 ARFIP2 ARHGAP26*  
1300 *ARHGEF18 ARRB1 ARRB2 ASAP1 ATG10 ATG12 ATG13 ATG14 ATG16L1 ATG3 ATG4A*  
1301 *ATG4B ATG4C ATG4D ATG5 ATG7 ATG9A ATG9B ATP6V0C ATP6V1B1 ATP6V1B2 BAG4*  
1302 *BCR BECN1 BLOC1S1 BLOC1S2 BLOC1S3 BLOC1S4 BLOC1S5 BMP2K CAND1 CAPZA1*  
1303 *CAPZB CAV1 CAV2 CAV3 CBL CBLC CCDC112 CCDC113 CCDC121 CCDC77 CCDC93*  
1304 *CCHCR1 CD2AP CD37 CD53 CD63 CD81 CD82 CDC42 CEP95 CHMP1A CHMP1B*  
1305 *CHMP2A CHMP2B CHMP3 CHMP4A CHMP4B CHMP4C CHMP5 CHMP6 CHMP7 CLCN3*  
1306 *CLCN4 CLCN5 CLCN6 CLCN7 CLTA CLTB CLTC COPA COPB1 COPB2 COPG1 COPG2*  
1307 *CTTN DAB2 DENND5A DLL1 DNAJC6 DNMI DNM2 DNM3 EEA1 EHD2 EPN1 EPN2 EPN3*  
1308 *EPS15 EPS15L1 EXOC3 EXOC6 EXOC8 F8A2 FAM21A FAM21C FCHO1 FIG4 FLOT1*  
1309 *FLOT2 FNBP1L FSCN1 FYCO1 GABARAP GABARAPL2 GCC2 GGA1 GGA2 GGA3 GPR107*  
1310 *GRB2 GRIPAP1 HGS HIP1 HIP1R HPS4 HSPA1A HSPA1B HSPA1L HSPA2 HSPA6 HSPA8*  
1311 *INPP4A INPP5B INPP5D INPP5E INPP5J INPP5K ITGA1 ITGA11 ITSN1 ITSN2 KIAA0196*  
1312 *KIAA1033 KIF16B LAMP1 LAMP2 LEPR LEPROT LGALS3 LGALS4 LIMK1 LIMK2 LYST*  
1313 *M6PR MAPKAPK2 MCOLN1 MCOLN2 MCOLN3 MICALL1 MICALL2 MKI67 MON1A*  
1314 *MON1B MSN MTOR MURC MVB12A MVB12B MYO5B NAPA NAPB NAPG NBEAL2 NBR1*  
1315 *NPC1 NPC2 NSF NUMB NUMBL OCRL OSBP OSBP2 OSBPL10 OSBPL11 OSBPL1A*  
1316 *OSBPL2 OSBPL3 OSBPL5 OSBPL6 OSBPL7 OSBPL8 OSBPL9 PAK1 PAK2 PDCD6IP PI4KB*  
1317 *PICALM PIK3C2A PIK3C2G PIK3C3 PIK3CB PIK3CD PIK3CG PIK3R4 PIKFYVE PIP4K2B*  
1318 *PIP4K2C PIP5K1C PIP5KL1 PLEKHM1 PLIN3 PMEL POM121 PRKCDBP PSMA7 PTEN*  
1319 *PTPMT1 PTRF RAB11A RAB11B RAB11FIP1 RAB11FIP2 RAB11FIP3 RAB11FIP4*  
1320 *RAB11FIP5 RAB12 RAB13 RAB14 RAB15 RAB17 RAB1B RAB20 RAB21 RAB22A RAB24*  
1321 *RAB25 RAB26 RAB27A RAB27B RAB29 RAB31 RAB35 RAB37 RAB38 RAB3B RAB3D*  
1322 *RAB3IL1 RAB3IP RAB4A RAB4B RAB5A RAB5B RAB5C RAB7A RAB7B RAB9A RAB9B*  
1323 *RABEP1 RABEP2 RABEPK RABGEF1 RABIF RAC1 RALBP1 RBSN REP15 REPS1 REPS2*  
1324 *RHOA RHOBTB3 RICTOR RILP RIMS1 RNF115 ROCK1 ROCK2 RPTOR RUBCN RUFY1*

1325 *SACMIL SCAMP1 SCAMP2 SCAMP3 SCAMP4 SCAMP5 SCARB2 SCYL2 SDCBP SDPR*  
1326 *SGSM2 SH3GL1 SH3GL2 SH3GL3 SH3GLB1 SH3GLB2 SH3TC2 SMAP1 SNAP23 SNAP91*  
1327 *SNF8 SNX1 SNX10 SNX11 SNX12 SNX13 SNX14 SNX15 SNX16 SNX17 SNX18 SNX19 SNX2*  
1328 *SNX20 SNX21 SNX22 SNX24 SNX25 SNX27 SNX4 SNX5 SNX6 SNX7 SNX8 SNX9 SOS1 SPC25*  
1329 *SPIRE1 SQSTM1 STAM STAM2 STAMBIP STX11 STX12 STX6 STX7 SURF4 SYNJ1 SYNJ2*  
1330 *SYNRG SYTL4 TBC1D10A TBC1D10B TBC1D10C TBC1D14 TBC1D2B TBC1D5 TMEM55A*  
1331 *TNIK TNK2 TPCN1 TPCN2 TPTE2 TRIM4 TSG101 TYRP1 UBAP1 UBQLN2 ULK1 ULK3*  
1332 *UNC119 UNC13A UNC13B UNC13C UNC13D USP8 VAC14 VAMP3 VAMP4 VAMP7 VAMP8*  
1333 *VAPA VAPB VCP VPS11 VPS16 VPS18 VPS25 VPS26A VPS26B VPS28 VPS29 VPS33A*  
1334 *VPS33B VPS35 VPS36 VPS37A VPS37B VPS37C VPS37D VPS39 VPS41 VPS45 VPS4A VPS4B*  
1335 *VPS52 VPS53 VPS54 VTA1 VTIIB WAS WASH1 WASL WDFY3 WDR44 WIP1 ZFYVE16*  
1336 *ZFYVE27 ZFYVE9.*

1337 **Table S2. List of differentially expressed genes in the early stages of CRC.**

1338 *ARHGEF18, BAG4, CD82, FAM21C, HPS4, ITSN1, LAMP2, MICALL1, PIK3CD, PRKCDBP,*

1339 *RAB12, RAB3IL1, RABEPK, SCAMP5, SMAP1, SNX1, SNX8, SNX9, SPIRE1, WASL.*

1340 **Table S3. List of differentially expressed genes in the advanced stages of CRC.**

1341 *ANXA2, ARFGEF2, BLOC1S3, CD37, DNMI, DNM3, GABARAP, HIP1, INPP5J, LAMP1,*

1342 *NPC2, OSBPL8, SNX11, SNX25, STAM, STX11, STX6, SYTL4, VCP, VPS37B, WAS.*

1343 **Table S4. Expression of genes encoding ESCRT-I subunits in COAD and READ cohorts of**  
1344 **TCGA patients at the early (stage I and II) and advanced stages (stage III and IV) of CRC.**  
1345 Table shows fold change ratio between the matched healthy and cancer patient tissue in the  
1346 logarithmic scale (Log2FC); with associated false discovery rate (FDR) upon differential  
1347 expression analysis using TCGAbiolinks.

1348

| Gene          | Early stages |      | Advanced stages |      |
|---------------|--------------|------|-----------------|------|
|               | Log2FC       | FDR  | Log2FC          | FDR  |
| <i>VPS37A</i> | -0.294       | 0.09 | -0.308          | 0.23 |
| <i>VPS37B</i> | -0.266       | 0.15 | -0.686          | 0.02 |
| <i>VPS37C</i> | -0.070       | 0.64 | -0.102          | 0.71 |
| <i>TSG101</i> | -0.006       | 0.97 | -0.136          | 0.66 |
| <i>VPS28</i>  | -0.439       | 0.01 | 0.198           | 0.52 |

1349

1350 **Table S5. Association of Vps37A and Vps37B protein levels clinicopathological features of**  
 1351 **n=100 CRC patients.** Abbreviations: pT - pathological tumors status, pN – pathological nodes  
 1352 status, G – disease grade.

1353

| pT status | Vps37A staining intensity | Vps37B staining intensity | Number of patients |
|-----------|---------------------------|---------------------------|--------------------|
| 1         | 2                         | 2                         | 2                  |
| 2         | 2                         | 1                         | 4                  |
| 2         | 2                         | 2                         | 13                 |
| 3         | 2                         | 1                         | 22                 |
| 3         | 2                         | 2                         | 43                 |
| 3a        | 2                         | 2                         | 1                  |
| 3b        | 2                         | 1                         | 1                  |
| 3b        | 2                         | 2                         | 1                  |
| 3c        | 2                         | 1                         | 1                  |
| 3c        | 2                         | 2                         | 1                  |
| 4a        | 2                         | 1                         | 1                  |
| 4a        | 2                         | 2                         | 4                  |
| 4b        | 2                         | 1                         | 1                  |
| 4b        | 2                         | 2                         | 5                  |

1354

| pN status | Vps37A staining intensity | Vps37B staining intensity | Number of patients |
|-----------|---------------------------|---------------------------|--------------------|
| 0         | 2                         | 1                         | 15                 |
| 0         | 2                         | 2                         | 48                 |
| 1a        | 2                         | 1                         | 5                  |
| 1a        | 2                         | 2                         | 12                 |
| 1b        | 2                         | 2                         | 7                  |
| 1c        | 2                         | 1                         | 2                  |
| 1c        | 2                         | 2                         | 1                  |
| 2a        | 2                         | 1                         | 5                  |
| 2a        | 2                         | 2                         | 2                  |
| 2b        | 2                         | 1                         | 3                  |

1355

| G | Vps37A staining intensity | Vps37B staining intensity | Number of patients |
|---|---------------------------|---------------------------|--------------------|
| 2 | 2                         | 1                         | 21                 |
| 2 | 2                         | 2                         | 51                 |
| 3 | 2                         | 1                         | 9                  |
| 3 | 2                         | 2                         | 19                 |

1356



1357 **Table S6. List of differentially expressed genes in COAD and READ cohorts of TCGA**  
1358 **patients at the early (stage I and II) and advanced stages (stage III and IV) of CRC.** Table is  
1359 available as a supplemental file for this manuscript. Table shows fold change ratio between the  
1360 matched healthy and cancer patient tissue in the logarithmic scale (Log<sub>2</sub>FC); with associated  
1361 false discovery rate (FDR) upon differential expression analysis using TCGAbiolinks. Genes  
1362 with increased and decreased expression are those with  $FDR < 0.05$  and  $\log_2FC \geq 0.6$  and  $\leq -0.6$ ,  
1363 respectively. Empty records signify no significant changes for the given gene.

1364 Table S7. List of siRNA combinations used in the present study.

1365

| Silencing condition        | siRNA#1 | siRNA#2 | siRNA#3 | siRNA#4 |
|----------------------------|---------|---------|---------|---------|
| <b>Single silencing</b>    |         |         |         |         |
| siCTRL-S#1                 | 4390843 |         |         |         |
| siCTRL-S#2                 | 4390846 |         |         |         |
| siTSG101#1                 | s14439  |         |         |         |
| siTSG101#2                 | s14440  |         |         |         |
| siVPS28#1                  | s27577  |         |         |         |
| siVPS28#2                  | s27579  |         |         |         |
| siVPS37A#1                 | s44037  |         |         |         |
| siVPS37A#2                 | s44038  |         |         |         |
| siVPS37B#1                 | s36177  |         |         |         |
| siVPS37B#2                 | s36178  |         |         |         |
| siVPS37C#1                 | s30059  |         |         |         |
| siVPS37C#2                 | s30060  |         |         |         |
| siUBAP1#1                  | s27812  |         |         |         |
| siUBAP1#1                  | s27813  |         |         |         |
| siMVB12A#1                 | s41121  |         |         |         |
| siMVB12A#2                 | s41122  |         |         |         |
| siMVB12B#1                 | s40157  |         |         |         |
| siMVB12B#2                 | s40158  |         |         |         |
| <b>Double silencing</b>    |         |         |         |         |
| siCTRL-D#1                 | 4390843 | 4390843 |         |         |
| siTSG101-D#2               | s14440  | 4390843 |         |         |
| siTSG101#2+CDKN1A#1        | s14440  | s415    |         |         |
| siTSG101#2+CDKN1A#2        | s14440  | s417    |         |         |
| <b>Triple silencing</b>    |         |         |         |         |
| siCTRL#1                   | 4390843 | NC3     | NC4     |         |
| siCTRL#2                   | 4390843 | 4390846 | NC4     |         |
| siVPS37A#1                 | s44037  | 4390843 | NC4     |         |
| siVPS37A#2                 | s44038  | 4390843 | NC4     |         |
| siVPS37B#1                 | s36177  | 4390843 | NC4     |         |
| siVPS37B#2                 | s36178  | 4390843 | NC4     |         |
| siVPS37C#1                 | s30059  | 4390843 | NC4     |         |
| siVPS37C#2                 | s30060  | 4390843 | NC4     |         |
| siVPS37AB#1                | s44037  | s36177  | 4390843 |         |
| siVPS37AB#2                | s44038  | s36178  | 4390843 |         |
| siVPS37AC#1                | s44037  | s30059  | 4390843 |         |
| siVPS37AC#2                | s44038  | s30060  | 4390843 |         |
| siVPS37BC#1                | s36177  | s30059  | 4390843 |         |
| siVPS37BC#2                | s36178  | s30060  | 4390843 |         |
| siVPS37ABC#1               | s44037  | s36177  | s30059  |         |
| siVPS37ABC#2               | s44038  | s36178  | s30060  |         |
| siTSG101#2                 | s14440  | 4390846 | NC4     |         |
| <b>Quadruple silencing</b> |         |         |         |         |
| siCTRL-Q                   | 4390843 | 4390846 | NC3     | NC4     |
| siVPS37ABC                 | s44037  | s36177  | s30059  | 4390843 |
| siCDKN1A#1                 | s415    | 4390843 | NC3     | NC4     |
| siCDKN1A#2                 | s417    | 4390843 | NC3     | NC4     |

|                              |        |         |        |        |
|------------------------------|--------|---------|--------|--------|
| <b>siRELA</b>                | s11916 | 4390843 | NC3    | NC4    |
| <b>siVPS37ABC+siCDKN1A#1</b> | s44037 | s36177  | s30059 | s415   |
| <b>siVPS37ABC+siCDKN1A#2</b> | s44037 | s36177  | s30059 | s417   |
| <b>siVPS37ABC+siRELA</b>     | s44037 | s36177  | s30059 | s11916 |

1366

1367 **Table S8. List of antibodies used in the present study.** Abbreviations: WB – Western blot, IHC  
 1368 – Immunohistochemistry.

1369

| <b>Antibody</b>    | <b>Species</b> | <b>Technique</b> | <b>Dilution</b>        | <b>Company</b>            | <b>Catalog number</b> |
|--------------------|----------------|------------------|------------------------|---------------------------|-----------------------|
| <b>VPS37A</b>      | Rabbit         | WB, IHC          | WB 1:1000<br>IHC 1:100 | Proteintech               | 11870-1-AP            |
| <b>VPS37B</b>      | Rabbit         | WB, IHC          | WB 1:1000<br>IHC 1:100 | Sigma                     | HPA-038218            |
| <b>VPS37C</b>      | Goat           | WB               | WB 1:500               | Abcam                     | Ab40851               |
| <b>TSG101</b>      | Rabbit         | WB               | WB 1:1000              | Abcam                     | Ab133586              |
| <b>VPS28</b>       | Rabbit         | WB               | WB 1:1000              | Abcam                     | Ab167172              |
| <b>UBAP1</b>       | Rabbit         | WB               | WB 1:1000              | Proteintech               | 12385-1-AP            |
| <b>MVB12A</b>      | Rabbit         | WB               | WB 1:1000              | Atlas Antibodies          | HPA041885             |
| <b>MVB12B</b>      | Rabbit         | WB               | WB 1:1000              | Atlas Antibodies          | HPA043683             |
| <b>Phospho-p65</b> | Rabbit         | WB               | WB 1:1000              | Cell Signaling Technology | 3033                  |
| <b>p65</b>         | Mouse          | WB               | WB 1:1000              | Cell Signaling Technology | 6956                  |
| <b>p100/p52</b>    | Rabbit         | WB               | WB 1:1000              | Cell Signaling Technology | 4882                  |
| <b>Phospho-JNK</b> | Rabbit         | WB               | WB 1:500               | Cell Signaling Technology | 9255                  |
| <b>Phospho-ERK</b> | Rabbit         | WB               | WB 1:1000              | Cell Signaling Technology | 9101                  |
| <b>Phospho-p38</b> | Rabbit         | WB               | WB 1:500               | Cell Signaling Technology | 9216                  |
| <b>p21</b>         | Rabbit         | WB               | WB 1:2000              | Cell Signaling Technology | 2947                  |
| <b>Vinculin</b>    | Mouse          | WB               | WB 1:5000              | Sigma-Aldrich             | V9131                 |

1370

1371 **Table S9. List of primers used in the present study.**

1372

| Gene of interest | Forward primer sequence   | Reverse primer sequence   |
|------------------|---------------------------|---------------------------|
| <i>ACTB</i>      | CAGGTCATCACCATTGGCAAT     | TCTTTGCGGATGTCCACGT       |
| <i>GAPDH</i>     | CATGTTTCGTCATGGGTGTGA     | GTGATGGCATGGACTGTGGT      |
| <i>CDKN1A</i>    | TGCCGAAGTCAGTTCCTTGT      | GTTCTGACATGGCGCCTCC       |
| <i>CDKN2B</i>    | GGGACTAGTGGAGAAGGTG       | CATCATCATGACCTGGATCGC     |
| <i>CDKN2D</i>    | CGCTGCAGGTCATGATGTTT      | GGGTGTCCAGGAATCCAGTG      |
| <i>CXCL8</i>     | GCTCTCTTGGCAGCCTTCCTGA    | TTTCCTTGGGGTCCAGACAGAGC   |
| <i>ICAMI</i>     | GGAGCCCGCTGAGGTCACGA      | AGTCGCTGGCAGGACAAAGGT     |
| <i>NFKBIA</i>    | CGCCCAAGCACCCGGATACA      | AGGGCAGCTCGTCCTCTGTGA     |
| <i>RELA</i>      | AGCTTGTAGGAAAGGACTGCC     | ATAGGAACTTGGAAGGGGTTGTTGT |
| <i>TNFAIP3</i>   | GTGATCGGCCCCCAGAGGGA      | TGAGGGTTTGCTACAACATGGGC   |
| <i>VPS37A</i>    | TAGTGAGAGCTGTAGTGCAAGTGCC | TCGCCTGCTGAAGTTTCTCTCCT   |
| <i>VPS37B</i>    | ACGTTGAAAGCACGCTTGAC      | TGCTAACAGGGTCTCCAAGG      |
| <i>VPS37C</i>    | GGAAGGCATGAAGATCGAAG      | TTCTCACCCTCCTGGAG         |

1373
